# Supplementary material for: Socioeconomic status, remoteness and tracking of nutritional status from childhood to adulthood in an Australian Aboriginal Birth Cohort: the ABC study
Source: PubMed Central journal article supplement — BMJ Open. 2020 Jan 27;10(1):e033631. doi: 10.1136/bmjopen-2019-033631 (PMC7045147; doi:10.1136/bmjopen-2019-033631), 2020-01-27
Supplement: bmjopen-2019-033631.draft_revisions.pdf [file bmjopen-2019-033631.draft_revisions.pdf]

# BMJ Open

BMJ Open is committed to open peer review. As part of this commitment we make the peer review history of every article we publish publicly available.

When an article is published we post the peer reviewers' comments and the authors' responses online. We also post the versions of the paper that were used during peer review. These are the versions that the peer review comments apply to.

The versions of the paper that follow are the versions that were submitted during the peer review process. They are not the versions of record or the final published versions. They should not be cited or distributed as the published version of this manuscript.

BMJ Open is an open access journal and the full, final, typeset and author-corrected version of record of the manuscript is available on our site with no access controls, subscription charges or pay-per-view fees (<http://bmjopen.bmj.com>).

If you have any questions on BMJ Open's open peer review process please email [info.bmjopen@bmj.com](mailto:info.bmjopen@bmj.com)

# BMJ Open

## **Socioeconomic status, remoteness, and tracking of nutritional status from childhood to adulthood in an Australian Aboriginal Birth Cohort ? the ABC study.**

|                               |                                                                                                                                                                                                                                                                                                                                                                                                                                                                                                                                                                          |
|-------------------------------|--------------------------------------------------------------------------------------------------------------------------------------------------------------------------------------------------------------------------------------------------------------------------------------------------------------------------------------------------------------------------------------------------------------------------------------------------------------------------------------------------------------------------------------------------------------------------|
| Journal:                      | <i>BMJ Open</i>                                                                                                                                                                                                                                                                                                                                                                                                                                                                                                                                                          |
| Manuscript ID                 | bmjopen-2019-033631                                                                                                                                                                                                                                                                                                                                                                                                                                                                                                                                                      |
| Article Type:                 | Research                                                                                                                                                                                                                                                                                                                                                                                                                                                                                                                                                                 |
| Date Submitted by the Author: | 14-Aug-2019                                                                                                                                                                                                                                                                                                                                                                                                                                                                                                                                                              |
| Complete List of Authors:     | Sjöholm, Pauline; University of Turku, Department of Medicine<br>Pahkala, Katja; University of Turku, Research Centre of Applied and Preventive Cardiovascular Medicine; University of Turku, Paavo Nurmi Centre, Sports & Exercise Medicine Unit, Department of Physical Activity and Health<br>Davison, Belinda; Menzies School of Health Research<br>Juonala, Markus; University of Turku, Department of Medicine; Murdoch Childrens Research Institute<br>Singh, Gurmeet; Menzies School of Health Research; Flinders University, Northern Territory Medical Program |
| Keywords:                     | SOCIAL MEDICINE, PUBLIC HEALTH, Community child health < PAEDIATRICS, NUTRITION & DIETETICS, EPIDEMIOLOGY                                                                                                                                                                                                                                                                                                                                                                                                                                                                |
|                               |                                                                                                                                                                                                                                                                                                                                                                                                                                                                                                                                                                          |

SCHOLARONE™  
Manuscripts

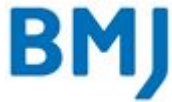

I, the Submitting Author has the right to grant and does grant on behalf of all authors of the Work (as defined in the below author licence), an exclusive licence and/or a non-exclusive licence for contributions from authors who are: i) UK Crown employees; ii) where BMJ has agreed a CC-BY licence shall apply, and/or iii) in accordance with the terms applicable for US Federal Government officers or employees acting as part of their official duties; on a worldwide, perpetual, irrevocable, royalty-free basis to BMJ Publishing Group Ltd ("BMJ") its licensees and where the relevant Journal is co-owned by BMJ to the co-owners of the Journal, to publish the Work in this journal and any other BMJ products and to exploit all rights, as set out in our [licence](#).

The Submitting Author accepts and understands that any supply made under these terms is made by BMJ to the Submitting Author unless you are acting as an employee on behalf of your employer or a postgraduate student of an affiliated institution which is paying any applicable article publishing charge ("APC") for Open Access articles. Where the Submitting Author wishes to make the Work available on an Open Access basis (and intends to pay the relevant APC), the terms of reuse of such Open Access shall be governed by a Creative Commons licence – details of these licences and which [Creative Commons](#) licence will apply to this Work are set out in our licence referred to above.

Other than as permitted in any relevant BMJ Author's Self Archiving Policies, I confirm this Work has not been accepted for publication elsewhere, is not being considered for publication elsewhere and does not duplicate material already published. I confirm all authors consent to publication of this Work and authorise the granting of this licence.

## Socioeconomic status, remoteness, and tracking of nutritional status from childhood to adulthood in an Australian Aboriginal Birth Cohort – the ABC study.

Pauline Sjöholm, MD<sup>1</sup> Katja Pahkala<sup>2</sup>, Belinda Davison<sup>3</sup>, Markus Juonala<sup>4</sup>, Gurmeet R Singh<sup>3,5</sup>

1 Department of Medicine; University of Turku, Turku, Finland.

This author takes responsibility for all aspects of the reliability and freedom from bias of the data presented and their discussed interpretation.

2 Research Centre of Applied and Preventive Cardiovascular Medicine, University of Turku, Turku, Finland; Paavo Nurmi Centre, Sports & Exercise Medicine Unit, Department of Physical Activity and Health, University of Turku, Turku, Finland

3 Menzies School of Health Research, Charles Darwin University, Darwin, Australia

4 Department of Medicine, University of Turku, Turku, Finland; Division of Medicine, Turku University Hospital, Turku, Finland; Murdoch Childrens Research Institute, Parkville, Victoria, Australia.

5 Northern Territory Medical Program, Flinders University, Darwin, Australia

**Conflicts of interest:** The authors report no relationships that could be construed as a conflict of interest.

**Contributorship statement:** P.S., K.P., B.D., G.S. and M.J. contributed to the design and implementation of the research as well as the analysis and interpretation of data. B.D. and G.S. contributed to acquisition and management of data for the work. P.S. wrote the paper with input from all authors. All authors approved of the final version to be submitted and agree to be accountable for all aspects of the work.

**Funding:** The authors received no specific funding for this paper

**Data sharing statement:** All data are stored confidentially and are not freely available in the public domain, but specific proposals for collaboration are welcomed. Collaborations are established through formal agreement with the steering committee. Contact information: [abcstudy@menzies.edu.au](mailto:abcstudy@menzies.edu.au)

**Ethics statement:** This study was approved by the Human Research Ethics Committee of Northern Territory Department of Health and Menzies School of Health Research, including the Aboriginal Ethical Sub-committee which has the power of veto (ABC Reference no. 2013-2022 and TEC Reference no. 2013-1986). All research was performed in accordance with the National Health and Medical Research Council guidelines (National Statement on Ethical Conduct in Human Research, 2008). Informed written consent was obtained from all participants.

**Key words:** Nutritional Status, Indigenous, Socioeconomic

**Reprint request and correspondence:** Pauline Sjöholm, Department of Medicine, University of Turku, Kiinamyllynkatu 10, FIN-20520 Turku, Finland. E-mail [plsjoh@utu.fi](mailto:plsjoh@utu.fi)

## ABSTRACT

**Objectives:** To determine prevalences of underweight and overweight as well as low and high waist-to-height ratio (WHtR) in three prospective follow-ups and to explore tracking of these measures of nutritional status from childhood to adolescence and adulthood. The influence of socioeconomic status, remoteness, maternal body mass index (BMI) and birth weight on weight status was assessed.

**Design:** Longitudinal birth cohort study of Aboriginal Australians.

**Setting:** Data derived from three follow-ups of the Aboriginal Birth Cohort (ABC) study with mean ages of 11.4, 18.2 and 25.4 years for the participants.

**Participants:** Of the 686 Aboriginal babies recruited to the study between 1987-1990, 315 had anthropometric measurements for all three follow-ups and were included in this study.

**Primary and secondary outcome measures:** Categories for BMI (underweight, normal weight, overweight and obesity) and WHtR (low and high), sex, areal socioeconomic disadvantage as defined by the Indigenous Relative Socioeconomic Outcomes index, urban/remote residence, maternal BMI, birth weight. Logistic regression was used to calculate odds ratios for belonging to a certain BMI category in adolescence and adulthood according to BMI category in childhood and adolescence.

**Results:** Underweight was common (38% in childhood and 24% in adulthood) and the prevalence of overweight/obesity increased with age (12% in childhood and 35% in adulthood). Both extremes of weight status as well as low and high WHtR tracked from childhood to adulthood. Underweight was more common and overweight less common in remote and more disadvantaged areas. Birth weight and maternal BMI were associated with later weight status. There were significant sex differences for prevalences and tracking of WHtR but not for BMI.

**Conclusions:** Socioeconomic factors, remoteness and gender must be addressed when assessing nutrition-related issues in the Aboriginal communities due to the variation in nutritional status and its behaviour over time within the Aboriginal population.

## ARTICLE SUMMARY

### Strengths and limitations of this study

- This cohort is the longest-running and largest Indigenous birth cohort in Australia and presents unique data about the health of the contemporary Aboriginal population.
- Despite logistic challenges relating to geography, accessibility and cultural issues, the retention rates were good.
- The present study offers novel findings about the geographical, socioeconomic and gender differences in nutritional status that should be addressed when developing new strategies to reduce the immense health inequalities in Australia.
- The study population was relatively small with a substantial amount of missing data.
- Morbidity and clinical events related to nutritional status remain to be analysed later as the participants were still young adults during the last follow-up.

## INTRODUCTION

The dual burden of simultaneous occurrence of obesity and underweight is a phenomenon commonly seen in low and middle-income countries but less so in high-income countries.[1]

The Aboriginal population in Australia has experienced a dramatic nutritional transition since European colonisation.[2] Indigenous Australians, especially those living in remote regions, are prone to a number of morbidities associated with non-favourable nutrition throughout life.[3] In 2012-2013, Indigenous Australians were 1.5 times as likely to be affected by obesity as non-Indigenous Australians, with 30% of Indigenous children aged 2-14 years and 66% of persons aged 15 and over being affected by overweight or obesity.[4] On the other hand, 8% of Indigenous children were underweight compared with 4.8% of non-Indigenous children.[5] Obesity is a well documented risk factor for cardiovascular disease, type 2 diabetes, cancer and several other non-communicable diseases.[6-7] Underweight, a possible manifestation of malnutrition and nutritional deficiencies,[8] is also associated with raised infection risk[9] and pregnancy complications.[10] Both extremes of body composition are associated with substantial medical costs for the communities involved.[11] Overweight and obesity tend to 'track' from childhood to adulthood, i.e. remain relatively stable throughout an individual's lifecourse, according to studies conducted in non-Indigenous populations.[12] There is a paucity of data in Aboriginal children and adolescents, not only regarding tracking of nutritional status but also about which anthropometric measures and cut-off points are most appropriate to define weight status for this population. Tracking of underweight is a topic less studied, but has been reported in some cohorts.[13]

Low socioeconomic status has been shown to be associated with obesity in several high-income countries.[14] In low and middle income countries, the association is often reversed, and persons of

1  
2  
3 higher socioeconomic status are more likely to be affected by obesity.[15] Little is known about the  
4  
5 association of socioeconomic status and weight status within indigenous populations.  
6  
7

8 The Aboriginal Birth Cohort (ABC) was formed to better understand the reasons behind the high  
9  
10 burden of disease of the Australian Aboriginal population and identify possibilities for early  
11  
12 prevention. To date, the study is one of the longest running and largest Indigenous cohorts in the  
13  
14 world. The intention of this paper is 1) to explore tracking of nutritional status from childhood to  
15  
16 adulthood and 2) to explore the association of socioeconomic status and remoteness at birth with  
17  
18 later nutritional status in the cohort.  
19  
20  
21  
22  
23  
24

## 25 **METHODS**

### 26 **Participants**

27  
28  
29 Details of the recruitment and follow-up of the ABC have been previously published in detail.[16-  
30  
31 17] Between 1987 and 1990, 686 of the eligible 1238 babies born to Aboriginal mothers at the  
32  
33 Royal Darwin Hospital were recruited into the study. There were no differences for mean birth  
34  
35 weights or sex ratios between those recruited and those not recruited. To date, three follow-ups have  
36  
37 been conducted: in childhood (mean age 11.4 years), adolescence (mean age 18.2 years) and most  
38  
39 recently in early adulthood (mean age 25.4 years). The last follow-up took place in 2014-2016 and  
40  
41 70.9% of living participants were examined. All procedures contributing to this work comply with  
42  
43 the Helsinki Declaration of 1975, as revised in 2008. All participants provided written informed  
44  
45 consent to participate in this study, and all procedures were approved by the Human Research  
46  
47 Ethics Committee of the Northern Territory Department of Health and the Menzies School of  
48  
49 Health Research, including the Aboriginal Ethical Sub-committee which has the power of veto.  
50  
51  
52  
53  
54  
55  
56  
57  
58  
59  
60



### **Patient and public involvement**

The study has clear commitment to engaging with Indigenous communities, recruiting community members as assistants and building Indigenous capacity, encouraging and facilitating formal research training. Extensive consultation was conducted prior to each follow-up to obtain advice on contact methods, acceptability of planned procedures and methods of feedback to individuals and communities. This consultation process involved expert, cultural and cohort reference groups. Due to the difficulty in providing individual feedback except in limited circumstances, feedback is aimed at the communities. Updates are published in community newsletters and in the national Aboriginal and Islander Health Worker Journal and provided to local community groups.

### **Anthropometric measurements**

Participants were categorised in classes of nutritional status using two alternative classifications: Body mass index (BMI), a widely used estimate for defining weight status and waist-to-height ratio (WHtR), an alternative anthropometric measure to define adiposity. WHtR has been suggested as a tool for better identifying abdominal obesity and delineating risk for cardiovascular disease and type 2 diabetes.[18] A cut-off value of 0.5 for WHtR has been commonly used for screening for cardio-metabolic risk irrespective of age, gender and ethnicity.[19–21] There is no consensus on a lower normal limit for WHtR, but a value of less than 0.4 has also been previously used.

At all follow-ups, weight was measured in light clothing while barefoot to the last complete 0.1 kg with a digital scale (TBF-521; Tanita Corporation, Arlington Heights, Illinois, USA). Height was measured with a portable stadiometer to the nearest millimetre using standardised procedures. BMI was calculated as weight (kg) divided by height (m) squared. Waist circumference was measured to the nearest millimeter using a flexible tape measure at the midpoint between the lowest rib and iliac crest at the end of expiration. WHtR was calculated as waist circumference in meters divided by

1  
2  
3 height in meters and categorised as low (<0.4), normal (0.4-0.49) or high ( $\geq 0.5$ ).[22] For  
4  
5 participants who had attained 18 years at follow-up, following BMI values for categories of weight  
6  
7 status were used: <18,5: underweight, 18.5-24.99: normal weight, 25-29.99: overweight,  $\geq 30$ :  
8  
9 obesity. For participants who were under 18 years of age at the time of the follow-up, specific age  
10  
11 and sex specific cut-off points were used for categories of weight status (underweight, normal  
12  
13 weight, overweight and obesity) as defined by the International Obesity Task Force.[23-24]  
14  
15 Participants who were pregnant at follow-up (N=26) were left out of analyses. Only participants  
16  
17 who had both height, weight and waist circumference recorded at all follow-ups were included  
18  
19 (N=315).  
20  
21  
22  
23  
24  
25  
26  
27  
28  
29

### 30 **Remoteness and childhood socioeconomic situation**

31  
32  
33 For areal socioeconomic disadvantage, the Indigenous Relative Socioeconomic Outcomes (IRSEO)  
34  
35 index was used. It is a score calculated at the Indigenous Area level and it is based on 9 variables, 3  
36  
37 related to employment, 3 to education, 2 to housing and 1 to income, using information from the  
38  
39 2011 Census of Population and Housing. Each area is assigned to one of 100 percentiles, 1 for the  
40  
41 most advantaged and 100 for the most disadvantaged.[25] Based on their reported addresses at  
42  
43 birth, the participants were assigned an IRSEO score. The scores were categorised into three  
44  
45 groups: low disadvantage (range 13 to 37), mid-high disadvantage (range 43 to 89), and high  
46  
47 disadvantage (range 91 to 99).  
48  
49  
50

51  
52 Families living in urban areas at birth were classified as urban and those in remote locations as non-  
53  
54 urban. Maternal BMI was recorded at birth and classified as underweight (< 18.5), normal weight  
55  
56 (18.5-24.99), overweight (25-29.99) or obese ( $\geq 30$ ). Birthweight of the participants was  
57  
58 transformed into Z-scores and put into 5 categories.  
59  
60

1  
2  
3  
4  
5  
6  
7  
8  
9  
10  
11  
12  
13  
14  
15  
16  
17  
18  
19  
20  
21  
22  
23  
24  
25  
26  
27  
28  
29  
30  
31  
32  
33  
34  
35  
36  
37  
38  
39  
40  
41  
42  
43  
44  
45  
46  
47  
48  
49  
50  
51  
52  
53  
54  
55  
56  
57  
58  
59  
60

## Statistical analyses

Tracking of weight status was analysed using logistic regression and defining the odds ratio (OR) of belonging to a certain weight class in adolescence and adulthood according to weight class in childhood and adolescence. Regression analyses were adjusted for age at later follow-up, sex and time between compared follow-ups. Overweight and obesity were combined into one category due to small numbers.

Chi-square tests were used to assess the association of weight status and categories of remoteness, socioeconomic status, maternal BMI and birth weight. Attrition analyses were performed to compare baseline characteristics between participants and non-participants of the follow-ups with t-tests for continuous and chi-square tests for categorical variables.

Statistical tests were performed with SAS version 9.4 (SAS Institute, Inc, Cary, NC). Statistical significance was inferred at a 2-tailed P-value  $< 0.05$ .

## Results

Descriptive statistics of the participants are presented in table 1 and results from the attrition analysis are reported in supplementary table 1. There were significant differences between participants and dropouts regarding remoteness and areal disadvantage: dropouts were more often urban residents and came from less disadvantaged areas according to IRSEO scores. There were no differences regarding sex, birth weight and maternal BMI.

*Anthropometric characteristics of participants*

|                                | Childhood    |              | Adolescence |             | Adulthood   |             |
|--------------------------------|--------------|--------------|-------------|-------------|-------------|-------------|
|                                | Male         | Female       | Male        | Female      | Male        | Female      |
| <b>Age, years ± SD</b>         | 11.1 ± 1.1   | 10.8 ± 1.1   | 17.9 ± 1.1  | 17.7 ± 1.1  | 25.4 ± 1.1  | 25.2 ± 1.2  |
| <b>Weight, kg</b>              | 34.3 ± 11.5  | 35.2 ± 11.5  | 64.1 ± 20.2 | 53.7 ± 13.0 | 71.1 ± 21.2 | 60.6 ± 16.0 |
| <b>Height, cm</b>              | 143.1 ± 10.1 | 143.0 ± 10.5 | 173.3 ± 6.9 | 161.3 ± 5.2 | 174.3 ± 7.0 | 161.4 ± 5.6 |
| <b>BMI</b>                     | 16.4 ± 3.5   | 16.8 ± 3.4   | 21.2 ± 5.6  | 20.7 ± 4.9  | 23.3 ± 6.0  | 23.3 ± 6.2  |
| <b>Waist circumference, cm</b> | 63.8 ± 9.5   | 63.9 ± 9.0   | 78.8 ± 14.5 | 77.7 ± 12.6 | 85.7 ± 16.0 | 86.2 ± 15.1 |
| <b>WHtR</b>                    | 0.45 ± 0.05  | 0.45 ± 0.05  | 0.45 ± 0.08 | 0.48 ± 0.08 | 0.49 ± 0.09 | 0.54 ± 0.1  |

*Early life characteristics of participants*

|                                   | Male        | Female      | Total               |
|-----------------------------------|-------------|-------------|---------------------|
| <b>N</b>                          | 158 (50.2%) | 157 (40.8%) | 315                 |
| <b>Urban residence, %</b>         | 13.3        | 8.3         | 10.8 (N=315)        |
| <b>Birth weight, Z score ± SD</b> | -0.16 ± 1.2 | -0.42 ± 1.1 | -0.29 ± 1.1 (N=293) |
| <b>IRSEO score</b>                | 78.6 ± 23.9 | 83.0 ± 19.7 | 80.8 ± 22.0 (N=315) |
| <b>BMI of mother</b>              | 22.0 ± 3.8  | 22.6 ± 4.4  | 22.3 ± 4.1 (N=236)  |

**Table 1.** Descriptive characteristics. Mean values with standard deviations for anthropometric measurements of participants in three follow-ups and baseline characteristics.

1  
2  
3 Prevalences of BMI derived weight classes according to sex are presented in figure 1. There were  
4  
5 no significant differences between the sexes in the prevalence of underweight, overweight or  
6  
7 obesity. For both sexes, the combined prevalence of underweight was 38.1 % in childhood, 38.1 %  
8  
9 in adolescence and 23.5 % in adulthood. The respective prevalences for overweight were 8.9 %,  
10  
11 12.1% and 22.9 %, and for obesity 2.9 %, 6.4 % and 11.8 %.

12  
13  
14  
15 Prevalences of low ( $<0.4$ ) and high ( $\geq 0.5$ ) WHtR in the three follow-ups are presented in figure 2.  
16  
17 There were no differences between the sexes in childhood. In later follow-ups, male participants  
18  
19 more often had a low WHtR (22.2 vs. 10.2 % in adolescence [ $P=0.004$ ] and 13.9 vs. 5.1 % in  
20  
21 adulthood [ $P=0.008$ ]) while female participants more often had a high WHtR (34.4 vs. 20.9 % in  
22  
23 adolescence [ $P=0.007$ ] and 58.6 vs. 36.1 % in adulthood [ $P<0.0001$ ]).

24  
25  
26  
27 The associations between weight class and urban residence, maternal BMI, areal disadvantage  
28  
29 (IRSEO) and birth weight are presented in figure 3. Urban participants were more often affected by  
30  
31 overweight/obesity and were less often underweight than non-urban participants in all follow-ups.  
32  
33 Maternal weight status was significantly associated with offspring weight status in all follow-ups  
34  
35 with children of underweight mothers being more often underweight and children of mothers  
36  
37 affected by overweight and obesity more often presenting with overweight and obesity. Areal  
38  
39 socioeconomic disadvantage was associated with weight class in all follow-ups: participants from  
40  
41 more disadvantaged areas were more often underweight and less often presented with  
42  
43 overweight/obesity than participants from less disadvantaged areas. Birth weight was also  
44  
45 associated with later weight status: smaller babies were more often underweight and were less often  
46  
47 affected by overweight or obesity in all follow-ups.

48  
49  
50  
51  
52  
53 Analyses of tracking of weight status according to BMI categories are presented in table 2. Tracking  
54  
55 was significant between age groups for all BMI categories and sex was not a significant confounder  
56  
57 in any of the analyses. Of the participants who were affected by overweight/obesity in childhood,  
58  
59 67.6% remained in the same weight status category in adolescence (OR 16.0,  $P < 0.0001$ ) and  
60

1  
2  
3 83.8% in adulthood (OR 9.8,  $P < 0.0001$ ). Of the adolescents affected by overweight/obesity, 86.2%  
4  
5 were affected by overweight/obesity as adults (OR 22.5,  $P < 0.0001$ ). Underweight status was also  
6  
7 significantly stable throughout the follow-ups. Of the participants who were underweight in  
8  
9 childhood, 76.7% were underweight in adolescence (OR 22.6,  $P < 0.0001$ ) and 46.7% remained  
10  
11 underweight in adulthood (OR 9.8,  $P < 0.0001$ ). Of underweight adolescents, 83.8% were  
12  
13 underweight in adulthood (OR 17.3,  $P < 0.0001$ ).  
14  
15  
16  
17  
18  
19  
20  
21  
22  
23  
24  
25  
26  
27  
28  
29  
30  
31  
32  
33  
34  
35  
36  
37  
38  
39  
40  
41  
42  
43  
44  
45  
46  
47  
48  
49  
50  
51  
52  
53  
54  
55  
56  
57  
58  
59  
60

For peer review only

1  
2 **Table 2.** Associations between weight classes at different timepoints  
3

|                       |                  | Adolescence |                  |         |                  |                 |         | Adulthood   |                  |         |                  |                   |         |
|-----------------------|------------------|-------------|------------------|---------|------------------|-----------------|---------|-------------|------------------|---------|------------------|-------------------|---------|
|                       |                  | Underweight |                  |         | Overweight/obese |                 |         | Underweight |                  |         | Overweight/obese |                   |         |
|                       |                  | %           | OR (CI)          | P-value | %                | OR(CI)          | P-value | %           | OR (CI)          | P-value | %                | OR (CI)           | P-value |
| 9 <b>Childhood</b>    | Underweight      | 76.7%       | 22.6 (12.2-42.0) | <0.0001 | 0%               | -               | -       | 46.7%       | 9.8 (5.2-18.6)   | <0.0001 | 8.3%             | 0.09 (0.04-0.2)   | <0.0001 |
|                       | Normal weight    | 17.7%       | 0.15 (0.09-0.3)  | <0.0001 | 20.9%            | 1.4 (0.8-2.5)   | 0.25    | 10.8%       | 0.2 (0.1-0.4)    | <0.0001 | 43.0%            | 2.1 (1.3-3.5)     | 0.002   |
|                       | Overweight/obese | 0%          | -                | -       | 67.6%            | 16.0 (7.1-35.7) | <0.0001 | 2.7%        | 0.07 (0.009-0.5) | 0.0095  | 83.8%            | 13.2 (5.3-33.0)   | <0.0001 |
| 13 <b>Adolescence</b> | Underweight      | -           | -                | -       | -                | -               | -       | 83.8%       | 17.3 (8.5-35.2)  | <0.0001 | 3.3%             | 0.03 (0.009-0.08) | <0.001  |
|                       | Normal weight    | -           | -                | -       | -                | -               | -       | 16.2%       | 0.2 (0.09-0.34)  | <0.0001 | 40.2%            | 1.6 (0.98-2.5)    | 0.06    |
|                       | Overweight/obese | -           | -                | -       | -                | -               | -       | 0%          | -                | -       | 86.2%            | 22.5 (10.0-51.0)  | <0.0001 |

19 Tracking of weight classes from childhood and adolescence to adolescence and adulthood, eg. of the children who were underweight at first follow-up, 76.7% remained underweight in adolescence and 46.7 % in adulthood.  
 20 Weight classes for participants < 18 years of age based on age and sex specific BMI cut-off points according to Cole et al. (2000, 2007). For adults: underweight BMI < 18.5; normal weight BMI 18.5-24.99; overweight/obese BMI ≥  
 21 25. OR adjusted for age (years) at earlier follow-up, time (years) between follow-ups and sex. % indicates percent of participants in weight class at later follow-up.  
 22  
 23  
 24  
 25  
 26  
 27  
 28  
 29  
 30  
 31  
 32  
 33  
 34  
 35  
 36  
 37  
 38  
 39  
 40  
 41  
 42  
 43  
 44  
 45  
 46

1  
2  
3  
4  
5  
6  
7  
8  
9 There was significant tracking of both low and high WHtR in all follow-ups with sex being a  
10 significant confounder in most analyses (table 3). Of the children who had a low WHtR, 44.7%  
11 remained in the same category in adolescence (OR 6.9,  $P < 0.0001$ ) and 23.7% in adulthood (OR  
12 4.5,  $P=0.001$ ) while 46.7% of adolescents with a low WHtR had a low WHtR in adulthood (OR  
13 45.1,  $P < 0.0001$ ). Of the children with a high WHtR, 71.1% had a high WHtR in adolescence (OR  
14 9.3,  $P < 0.0001$ ) and 94.7% in adulthood (OR 28.6,  $P < 0.0001$ ). Of adolescents with a high WHtR,  
15 85.1% remained in the same category in adulthood (OR 11.3,  $P < 0.0001$ ).  
16  
17  
18  
19  
20  
21  
22  
23  
24  
25  
26  
27  
28  
29  
30  
31  
32  
33  
34  
35  
36  
37  
38  
39  
40  
41  
42  
43  
44  
45  
46  
47  
48  
49  
50  
51  
52  
53  
54  
55  
56  
57  
58  
59  
60



**Table 3.** Associations between low and high WHtR at different time points

|             |            | Adolescence |                |         |               |                 |            |                  |         |               |                 | Adulthood  |                  |         |               |                 |            |                  |         |               |                 |
|-------------|------------|-------------|----------------|---------|---------------|-----------------|------------|------------------|---------|---------------|-----------------|------------|------------------|---------|---------------|-----------------|------------|------------------|---------|---------------|-----------------|
|             |            | WHtR < 0.4  |                |         |               |                 | WHtR ≥ 0.5 |                  |         |               |                 | WHtR < 0.4 |                  |         |               |                 | WHtR ≥ 0.5 |                  |         |               |                 |
|             |            | %           | OR (CI)        | P-value | OR for sex    | P-value for sex | %          | OR(CI)           | P-value | OR for sex    | P-value for sex | %          | OR (CI)          | P-value | OR for sex    | P-value for sex | %          | OR(CI)           | P-value | OR for sex    | P-value for sex |
| Childhood   | WHtR < 0.4 | 44.7        | 6.9 (3.2-15.1) | <0.0001 | 3.2 (1.6-6.4) | 0.001           | 2.6        | 0.05 (0.007-0.4) | 0.004   | 0.4 (0.3-0.7) | 0.002           | 23.7       | 4.5 (1.8-11.4)   | 0.001   | 3.5 (1.5-8.6) | 0.005           | 21.1       | 0.2 (0.1-0.5)    | 0.0005  | 0.4 (0.2-0.6) | <0.0001         |
|             | WHtR ≥ 0.5 | 0.0         | -              | -       | -             | -               | 71.1       | 9.3 (4.2-20.4)   | <0.0001 | 0.5 (0.3-0.8) | 0.005           | 0.0        | -                | -       | -             | -               | 94.7       | 28.6 (6.6-122.9) | <0.0001 | 0.4 (0.2-0.6) | <0.0001         |
| Adolescence | WHtR < 0.4 | -           | -              | -       | -             | -               | -          | -                | -       | -             | -               | 45.1       | 26.7 (10.3-69.2) | <0.0001 | 2.0 (0.8-5.3) | 0.2             | 9.8        | 0.1 (0.04-0.3)   | <0.0001 | 0.5 (0.3-0.7) | 0.001           |
|             | WHtR ≥ 0.5 | -           | -              | -       | -             | -               | -          | -                | -       | -             | -               | 0.0        | -                | -       | -             | -               | 85.1       | 11.3 (5.8-21.9)  | <0.0001 | 0.5 (0.3-0.8) | 0.003           |

Tracking of waist-to-height ratio from childhood and adolescence to adolescence and adulthood. OR adjusted for age (years) at earlier follow-up, time (years) between follow-ups and sex. OR for sex modeled as male vs female. % indicates per cent of participants in WHtR at later follow-up.

## DISCUSSION

The present study shows that there is significant tracking of nutritional status from childhood to adulthood among Indigenous Australians in this cohort, both when assessed with BMI or with WHtR categories. In contrast to BMI, there were significant differences between the sexes for both tracking and prevalence of WHtR categories with females more often presenting with central adiposity in adolescence and adulthood. This finding is consistent with previous studies that show that Aboriginal women in general have greater waist circumference than their non-Aboriginal counterparts.[26-27] We have previously found that females in this cohort have lower levels of physical activity, which may be a possible contributing factor.[28] Central adiposity is a known risk factor for cardiovascular morbidity which accounts for a substantial part of the disparity in health outcomes between Indigenous and non-Indigenous Australians. Therefore, women seem to be at particular risk for chronic disease due to their body fat composition.[27]

Both areal disadvantage and non-urban residence were associated with lower prevalence of overweight/obesity and higher rates of underweight. This is in contrast to a study from New South Wales, where Aboriginal people from more advantaged and urban surroundings had lower prevalences of obesity and overweight than those from remote and disadvantaged areas.[29] It seems that the spatial trend in obesity in this cohort is similar to that traditionally seen in low and middle income countries, where obesity is more concentrated in cities and wealthier regions and underweight is more common in remote and rural settings. [5] The dual burden of malnutrition and the urban-remote differential in nutritional status has been previously described in the cohort at an average age of 25 years.[30]

The association between maternal BMI and offspring BMI is consistent with previous studies. In the Generation R study, it was found that maternal obesity is associated with adverse cardiometabolic risk profiles including obesity, higher systolic blood pressure and adverse lipid levels in the offspring.[31] In the Avon Longitudinal Study of Parents and Children (ALSPAC), a

1  
2  
3 linear trend between maternal pre-pregnancy BMI and offspring adiposity levels was found:  
4  
5 offspring of underweight mothers had lower rates and offspring of overweight mothers had higher  
6  
7 rates of adiposity. DNA methylation was suggested as a mediating factor.[32]  
8  
9

10 From a public health point of view, the present paper presents further evidence that dietary  
11  
12 interventions need more tailored approaches, as there exist large variations within the Aboriginal  
13  
14 community regarding nutritional status and its behaviour over time. Interventions need to be  
15  
16 delivered within critical time windows and the gender perspective is essential: pre-pregnant women  
17  
18 and girls in general should receive special attention.[33] Nutrition education has been reported to  
19  
20 have some positive effect on obesity in Aboriginal communities[34], but novel approaches are  
21  
22 needed and the focus should be placed on the most affected and vulnerable members of the  
23  
24 communities. Increasing the levels of physical activity, especially in girls, may be a key factor.  
25  
26  
27

28  
29 The strengths of the study include its longitudinal design and well-structured follow-ups with  
30  
31 relatively good retention rates. The study population however is relatively small causing some  
32  
33 limitations to the interpretation of the results and as only participants with data from all follow-ups  
34  
35 were included, the missing data was quite substantial. There were significant differences between  
36  
37 participants and non-participants, as participants were more often from non-urban and more  
38  
39 disadvantaged areas. The presented associations between weight status and socioeconomic status,  
40  
41 remoteness, maternal BMI and birth weight are merely descriptive analyses presented separately for  
42  
43 each follow-up as the data was not analysed in a longitudinal fashion and correlation over time was  
44  
45 not assessed as this was not the main aim of the article. Other limitations include the definition of  
46  
47 socioeconomic status, as the individual level indicators of socioeconomic status such as income  
48  
49 were not available. IRSEO describes socioeconomic disadvantage on an area level and may not  
50  
51 reflect the individual situation of the participants. Finally, the participants were still young during  
52  
53 the last follow-up. After future follow-ups, cardiovascular morbidity and clinical events are likely to  
54  
55  
56  
57  
58  
59  
60

1  
2  
3 be more prevalent and could be analysed for even better understanding of the clinical relevance of  
4  
5 the nutritional status and obesity trends in this cohort.  
6  
7

8 In summary, the present study presents evidence on tracking of nutritional status from childhood to  
9  
10 adulthood in this unique Aboriginal cohort. Socioeconomic status and remoteness factors were  
11  
12 associated with weight status in all follow-ups. The differences in central adiposity between males  
13  
14 and females that seem to arise after childhood indicate a need for targeted and successfully timed  
15  
16 approaches in dietary interventions.  
17  
18  
19  
20  
21  
22  
23  
24  
25  
26  
27  
28  
29  
30  
31  
32  
33  
34  
35  
36  
37  
38  
39  
40  
41  
42  
43  
44  
45  
46  
47  
48  
49  
50  
51  
52  
53  
54  
55  
56  
57  
58  
59  
60

1  
2  
3  
4  
5  
6  
7  
8  
9  
10  
11  
12  
13  
14  
15  
16  
17  
18  
19  
20  
21  
22  
23  
24  
25  
26  
27  
28  
29  
30  
31  
32  
33  
34  
35  
36  
37  
38  
39  
40  
41  
42  
43  
44  
45  
46  
47  
48  
49  
50  
51  
52  
53  
54  
55  
56  
57  
58  
59  
60

## FIGURE LEGENDS

**Figure 1.** Percentages of underweight and overweight/obese participants by sex. For classification, age and sex specific cut-off points were used for participants under 18 years of age at follow-up. For participants aged 18 and over, underweight was classified as BMI < 18,5; normal weight as 18,5-24,99; overweight as 25-29,99 and obesity as  $\geq 30$ .

**Figure 2.** Prevalences for low and high waist-to-height ratio at three time points according to sex. P-values are calculated with chi-square tests and represent differences between sexes. Values are in percentages.

**Figure 3.** Prevalences of overweight/obesity and underweight in participants according to urban residence (A), maternal BMI (B), areal disadvantage (C), and birth weight (D). Chi-square tests were used to assess association between weight status and presented categories.

## References

- [1] Popkin BM, Adair LS, Ng SW. Global nutrition transition and the pandemic of obesity in developing countries. *Nutr. Rev.* 2012;70:3–21.
- [2] Ferguson M, Brown C, Geoga C et al. Traditional food availability and consumption in remote Aboriginal communities in the Northern Territory, Australia. *Aust. N. Z. J. Public Health* 2017;41:294–298.
- [3] Brimblecombe JK, Ferguson MM, Liberato SC et al. Characteristics of the community-level diet of Aboriginal people in remote northern Australia. *Med. J. Aust.* 2013;198:380–384.
- [4] Australian Bureau of Statistics. Australian Aboriginal and Torres Strait Islander Health Survey: First Results. ABS 2013.
- [5] AIHW. The health and welfare of Australia's Aboriginal and Torres Strait Islander peoples: 2015. Cat. no. IHW 147.
- [6] Expert Panel Members. Executive summary: Guidelines (2013) for the management of overweight and obesity in adults: A Report of the American College of Cardiology/American Heart Association Task Force on Practice Guidelines and The Obesity Society. *Obesity* 2014;22:S5–S39.
- [7] Franks PW, Hanson RL, Knowler WC et al. Childhood Obesity, Other Cardiovascular Risk Factors, and Premature Death. *N. Engl. J. Med.* 2010;362:485–493.
- [8] Cai W. Nutritional challenges for children in societies in transition. *Curr. Opin. Clin. Nutr. Metab. Care* 2014;17:278–284.
- [9] Dobner J, Kaser S. Body mass index and the risk of infection - from underweight to obesity. *Clin. Microbiol. Infect.* 2018;24:24–28.
- [10] Cristina Rossi A. Underweight and pregnancy. *BJOG Int. J. Obstet. Gynaecol.* 2016;123:2008–2008.
- [11] Hoque ME, Mannan M, Long KZ et al. Economic burden of underweight and overweight among adults in the Asia-Pacific region: a systematic review. *Trop. Med. Int. Health* 2016;21:458–469.
- [12] Singh AS, Mulder C, Twisk JWR et al. Tracking of childhood overweight into adulthood: a systematic review of the literature: Tracking of childhood overweight into adulthood. *Obes. Rev.* 2008;9:474–488.
- [13] De Wilde J, Middelkoop B, Verkerk P. Tracking of thinness and overweight in children of Dutch, Turkish, Moroccan and South Asian descent from 3 through 15 years of age: a historical cohort study. *Int. J. Obes.* 2018;42:1230–1238.
- [14] Devaux M, Sassi F. Social inequalities in obesity and overweight in 11 OECD countries. *Eur. J. Public Health* 2013;23:464–469.
- [15] Dinsa GD, Goryakin Y, Fumagalli E et al. Obesity and socioeconomic status in developing countries: a systematic review. *Obes. Rev.* 2012;13:1067–1079.
- [16] Sayers SM, Mackerras D, Singh G et al. An Australian Aboriginal birth cohort: a unique resource for a life course study of an Indigenous population. A study protocol. *BMC Int. Health Hum. Rights* 2003;3:1.
- [17] Sayers S et al. Australian Aboriginal Birth Cohort study: follow-up processes at 20 years. *BMC Int. Health Hum. Rights* 2009;9:23.
- [18] Ashwell M, Gunn P, Gibson S. Waist-to-height ratio is a better screening tool than waist circumference and BMI for adult cardiometabolic risk factors: systematic review and meta-analysis. *Obes. Rev.* 2012;13:275–286.
- [19] Browning LM, Hsieh SD, Ashwell M. A systematic review of waist-to-height ratio as a screening tool for the prediction of cardiovascular disease and diabetes: 0.5 could be a suitable global boundary value. *Nutr. Res. Rev.* 2010;23:247–269.
- [20] Khoury M, Manlhiot C, McCrindle BW. Role of the Waist/Height Ratio in the Cardiometabolic Risk Assessment of Children Classified by Body Mass Index. *J. Am. Coll. Cardiol.* 2013; 62:742–751.
- [21] Kuba VM, Leone C, Damiani D. Is waist-to-height ratio a useful indicator of cardio-metabolic risk in 6–10-year-old children? *BMC Pediatr.* 2013;13:1.
- [22] Zhang Y, Wang Z, Chu Z et al. Profiles of body mass index and the nutritional status among children and adolescents categorized by waist-to-height ratio cut-offs. *Int. J. Cardiol.* 2016;223:529–533.

- 1  
2  
3 [23] Cole TJ. Establishing a standard definition for child overweight and obesity worldwide: international  
4 survey. *BMJ* 2000;320:1240–1240.  
5 [24] Cole TJ, Flegal KM, Nicholls D et al. Body mass index cut offs to define thinness in children and  
6 adolescents: international survey. *BMJ* 2007;335:194.  
7 [25] Biddle N. CAEPR Indigenous Population Project: 2011 Census Papers. Paper 13. Socioeconomic  
8 outcomes. Centre for Aboriginal Economic Policy Research, The Australian National University 2013.  
9 [26] Piers LS, Rowley KG, Soares MJ et al. Relation of adiposity and body fat distribution to body mass  
10 index in Australians of Aboriginal and European ancestry. *Eur. J. Clin. Nutr.* 2003;57:956–963.  
11 [27] Adegbija OO, Wang Z. Gender variations in waist circumference levels between Aboriginal and non-  
12 Aboriginal Australian populations: A systematic review. *Obes. Res. Clin. Pract.* 2014;8:e513–e524.  
13 [28] Sjöholm P, Pahkala K, Davison B et al. Early life determinants of cardiovascular health in adulthood.  
14 The Australian Aboriginal Birth Cohort study. *Int. J. Cardiol.* 2018;269:304–309.  
15 [29] Thurber KA et al. Obesity and its association with sociodemographic factors, health behaviours and  
16 health status among Aboriginal and non-Aboriginal adults in New South Wales, Australia. *J. Epidemiol.*  
17 *Community Health* 2018;72:491–498.  
18 [30] Davison B, Goodall J, Whalan S et al. Nutritional dual burden in Indigenous young adults: The  
19 geographical differential. *Aust. J. Rural Health* 2019;27:14–21.  
20 [31] Gaillard R et al. Childhood Cardiometabolic Outcomes of Maternal Obesity During Pregnancy. Novelty  
21 and Significance: The Generation R Study. *Hypertension* 2014;63:683–691.  
22 [32] Sharp GC et al. Maternal pre-pregnancy BMI and gestational weight gain, offspring DNA methylation  
23 and later offspring adiposity: findings from the Avon Longitudinal Study of Parents and Children. *Int. J.*  
24 *Epidemiol.* 2015;44:1288–1304.  
25 [33] Vaivada T, Gaffey MF, Das JK et al. Evidence-based interventions for improvement of maternal and  
26 child nutrition in low-income settings: what's new? *Curr. Opin. Clin. Nutr. Metab. Care* 2017;20:204–  
27 210.  
28 [34] Schembri L et al. The effect of nutrition education on nutrition-related health outcomes of Aboriginal  
29 and Torres Strait Islander people: a systematic review. *Aust. N. Z. J. Public Health* 2016;40:S42–S47.  
30  
31  
32  
33  
34  
35  
36  
37  
38  
39  
40  
41  
42  
43  
44  
45  
46  
47  
48  
49  
50  
51  
52  
53  
54  
55  
56  
57  
58  
59  
60

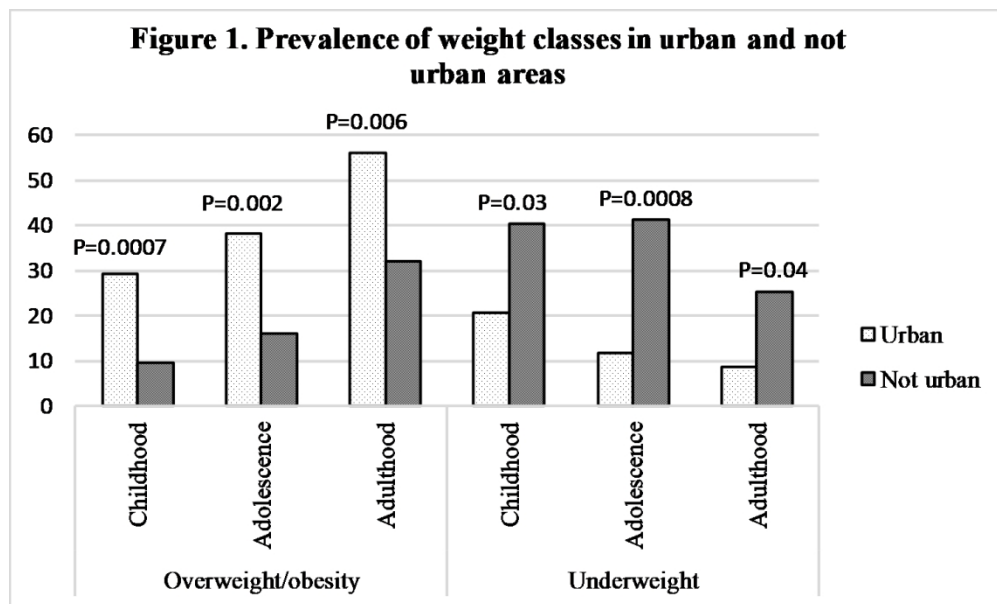

127x76mm (300 x 300 DPI)



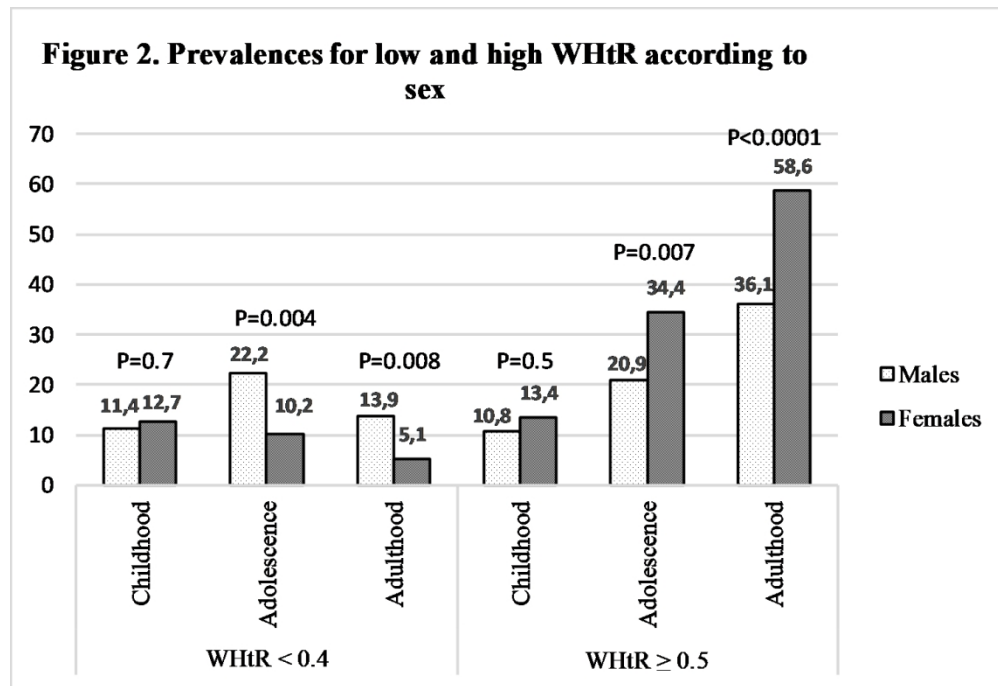

127x86mm (300 x 300 DPI)

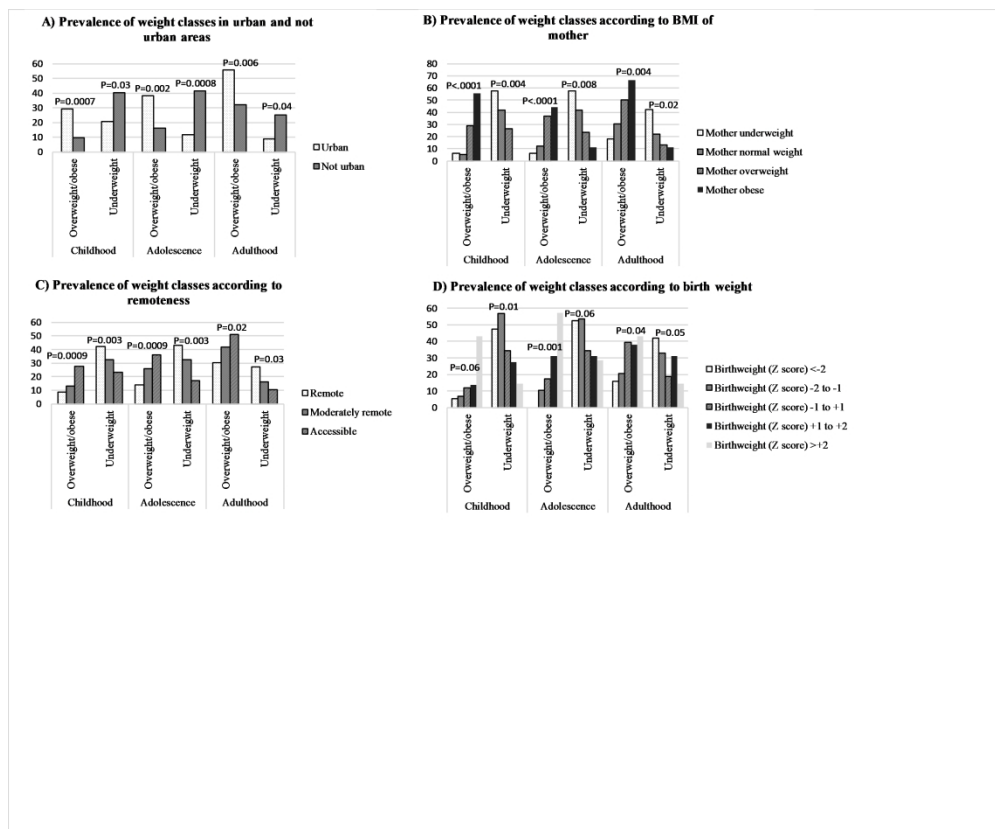

294x242mm (300 x 300 DPI)

1  
2  
3  
4  
5  
6  
7  
8  
9  
10  
11  
12  
13  
14  
15  
16  
17  
18  
19  
20  
21  
22  
23  
24  
25  
26  
27  
28  
29  
30  
31  
32  
33  
34  
35  
36  
37  
38  
39  
40  
41  
42  
43  
44  
45  
46  
47  
48  
49  
50  
51  
52  
53  
54  
55  
56  
57  
58  
59  
60**Supplementary table 1.** Attrition analysis.

|                      | Participants<br>(N=315) | Dropouts<br>(N=371) | P-value  |
|----------------------|-------------------------|---------------------|----------|
| Males (%)            | 50.2                    | 53.1                | P=0.44   |
| Urban residence (%)  | 10.8                    | 31.8                | P<0.0001 |
| Birthweight, z score | -0.29                   | -0.30               | P=0.95   |
| IRSEO score          | 80.8                    | 65.9                | P<0.0001 |
| Maternal BMI         | 22.2                    | 22.3                | P=0.71   |

Comparison between participants and dropouts. Values for categorical variables (sex, urban residence) are presented in percentages and values for continuous variables in means. Chi-square tests were used for analysis of categorical variables and t-tests for continuous variables.

1  
2  
3  
4  
5  
6  
7  
8  
9  
10  
11  
12  
13  
14  
15  
16  
17  
18  
19  
20  
21  
22  
23  
24  
25  
26  
27  
28  
29  
30  
31  
32  
33  
34  
35  
36  
37  
38  
39  
40  
41  
42  
43  
44  
45  
46  
47  
48  
49  
50  
51  
52  
53  
54  
55  
56  
57  
58  
59  
60

For peer review only

STROBE Statement—Checklist of items that should be included in reports of *cohort studies*

|                              | Item No | Recommendation                                                                                                                                                                                                                                                                                                         | Page No |
|------------------------------|---------|------------------------------------------------------------------------------------------------------------------------------------------------------------------------------------------------------------------------------------------------------------------------------------------------------------------------|---------|
| <b>Title and abstract</b>    | 1       | (a) Indicate the study's design with a commonly used term in the title or the abstract<br>(b) Provide in the abstract an informative and balanced summary of what was done and what was found                                                                                                                          | 2<br>2  |
| <b>Introduction</b>          |         |                                                                                                                                                                                                                                                                                                                        |         |
| Background/rationale         | 2       | Explain the scientific background and rationale for the investigation being reported                                                                                                                                                                                                                                   | 4-5     |
| Objectives                   | 3       | State specific objectives, including any prespecified hypotheses                                                                                                                                                                                                                                                       | 5       |
| <b>Methods</b>               |         |                                                                                                                                                                                                                                                                                                                        |         |
| Study design                 | 4       | Present key elements of study design early in the paper                                                                                                                                                                                                                                                                | 5       |
| Setting                      | 5       | Describe the setting, locations, and relevant dates, including periods of recruitment, exposure, follow-up, and data collection                                                                                                                                                                                        | 5       |
| Participants                 | 6       | (a) Give the eligibility criteria, and the sources and methods of selection of participants. Describe methods of follow-up<br>(b) For matched studies, give matching criteria and number of exposed and unexposed                                                                                                      | 5       |
| Variables                    | 7       | Clearly define all outcomes, exposures, predictors, potential confounders, and effect modifiers. Give diagnostic criteria, if applicable                                                                                                                                                                               | 6-7     |
| Data sources/<br>measurement | 8*      | For each variable of interest, give sources of data and details of methods of assessment (measurement). Describe comparability of assessment methods if there is more than one group                                                                                                                                   | 6-7     |
| Bias                         | 9       | Describe any efforts to address potential sources of bias                                                                                                                                                                                                                                                              | 5, 12   |
| Study size                   | 10      | Explain how the study size was arrived at                                                                                                                                                                                                                                                                              | 5       |
| Quantitative variables       | 11      | Explain how quantitative variables were handled in the analyses. If applicable, describe which groupings were chosen and why                                                                                                                                                                                           | 6-7     |
| Statistical methods          | 12      | (a) Describe all statistical methods, including those used to control for confounding<br>(b) Describe any methods used to examine subgroups and interactions<br>(c) Explain how missing data were addressed<br>(d) If applicable, explain how loss to follow-up was addressed<br>(e) Describe any sensitivity analyses | 8       |
| <b>Results</b>               |         |                                                                                                                                                                                                                                                                                                                        |         |
| Participants                 | 13*     | (a) Report numbers of individuals at each stage of study—eg numbers potentially eligible, examined for eligibility, confirmed eligible, included in the study, completing follow-up, and analysed<br>(b) Give reasons for non-participation at each stage<br>(c) Consider use of a flow diagram                        | 5       |
| Descriptive data             | 14*     | (a) Give characteristics of study participants (eg demographic, clinical, social) and information on exposures and potential confounders<br>(b) Indicate number of participants with missing data for each variable of interest<br>(c) Summarise follow-up time (eg, average and total amount)                         | table 1 |
| Outcome data                 | 15*     | Report numbers of outcome events or summary measures over time                                                                                                                                                                                                                                                         | table 1 |

|                                                                                                                                                                                              |                          |    |                                                                                                                                                                                                                                                                                                                                                                                                               |       |
|----------------------------------------------------------------------------------------------------------------------------------------------------------------------------------------------|--------------------------|----|---------------------------------------------------------------------------------------------------------------------------------------------------------------------------------------------------------------------------------------------------------------------------------------------------------------------------------------------------------------------------------------------------------------|-------|
| 1<br>2<br>3<br>4<br>5<br>6<br>7<br>8                                                                                                                                                         | Main results             | 16 | (a) Give unadjusted estimates and, if applicable, confounder-adjusted estimates and their precision (eg, 95% confidence interval). Make clear which confounders were adjusted for and why they were included<br>(b) Report category boundaries when continuous variables were categorized<br>(c) If relevant, consider translating estimates of relative risk into absolute risk for a meaningful time period | 8-10  |
| 9<br>10<br>11                                                                                                                                                                                | Other analyses           | 17 | Report other analyses done—eg analyses of subgroups and interactions, and sensitivity analyses                                                                                                                                                                                                                                                                                                                |       |
| 12                                                                                                                                                                                           | <b>Discussion</b>        |    |                                                                                                                                                                                                                                                                                                                                                                                                               |       |
| 13<br>14<br>15<br>16<br>17<br>18<br>19<br>20<br>21                                                                                                                                           | Key results              | 18 | Summarise key results with reference to study objectives                                                                                                                                                                                                                                                                                                                                                      | 10-11 |
| 22<br>23<br>24<br>25<br>26<br>27<br>28                                                                                                                                                       | Limitations              | 19 | Discuss limitations of the study, taking into account sources of potential bias or imprecision. Discuss both direction and magnitude of any potential bias                                                                                                                                                                                                                                                    | 12    |
| 29<br>30<br>31<br>32<br>33<br>34<br>35<br>36<br>37<br>38<br>39<br>40<br>41<br>42<br>43<br>44<br>45<br>46<br>47<br>48<br>49<br>50<br>51<br>52<br>53<br>54<br>55<br>56<br>57<br>58<br>59<br>60 | Interpretation           | 20 | Give a cautious overall interpretation of results considering objectives, limitations, multiplicity of analyses, results from similar studies, and other relevant evidence                                                                                                                                                                                                                                    | 11-12 |
|                                                                                                                                                                                              | Generalisability         | 21 | Discuss the generalisability (external validity) of the study results                                                                                                                                                                                                                                                                                                                                         | 12    |
|                                                                                                                                                                                              | <b>Other information</b> |    |                                                                                                                                                                                                                                                                                                                                                                                                               |       |
|                                                                                                                                                                                              | Funding                  | 22 | Give the source of funding and the role of the funders for the present study and, if applicable, for the original study on which the present article is based                                                                                                                                                                                                                                                 | 1     |

\*Give information separately for exposed and unexposed groups.

**Note:** An Explanation and Elaboration article discusses each checklist item and gives methodological background and published examples of transparent reporting. The STROBE checklist is best used in conjunction with this article (freely available on the Web sites of PLoS Medicine at <http://www.plosmedicine.org/>, Annals of Internal Medicine at <http://www.annals.org/>, and Epidemiology at <http://www.epidem.com/>). Information on the STROBE Initiative is available at <http://www.strobe-statement.org>.

# BMJ Open

## Socioeconomic status, remoteness, and tracking of nutritional status from childhood to adulthood in an Australian Aboriginal Birth Cohort - the ABC study.

|                                 |                                                                                                                                                                                                                                                                                                                                                                                                                                                                                                                                                                          |
|---------------------------------|--------------------------------------------------------------------------------------------------------------------------------------------------------------------------------------------------------------------------------------------------------------------------------------------------------------------------------------------------------------------------------------------------------------------------------------------------------------------------------------------------------------------------------------------------------------------------|
| Journal:                        | <i>BMJ Open</i>                                                                                                                                                                                                                                                                                                                                                                                                                                                                                                                                                          |
| Manuscript ID                   | bmjopen-2019-033631.R1                                                                                                                                                                                                                                                                                                                                                                                                                                                                                                                                                   |
| Article Type:                   | Research                                                                                                                                                                                                                                                                                                                                                                                                                                                                                                                                                                 |
| Date Submitted by the Author:   | 25-Nov-2019                                                                                                                                                                                                                                                                                                                                                                                                                                                                                                                                                              |
| Complete List of Authors:       | Sjöholm, Pauline; University of Turku, Department of Medicine<br>Pahkala, Katja; University of Turku, Research Centre of Applied and Preventive Cardiovascular Medicine; University of Turku, Paavo Nurmi Centre, Sports & Exercise Medicine Unit, Department of Physical Activity and Health<br>Davison, Belinda; Menzies School of Health Research<br>Juonala, Markus; University of Turku, Department of Medicine; Murdoch Childrens Research Institute<br>Singh, Gurmeet; Menzies School of Health Research; Flinders University, Northern Territory Medical Program |
| <b>Primary Subject Heading</b>: | Nutrition and metabolism                                                                                                                                                                                                                                                                                                                                                                                                                                                                                                                                                 |
| Secondary Subject Heading:      | Epidemiology, Public health                                                                                                                                                                                                                                                                                                                                                                                                                                                                                                                                              |
| Keywords:                       | SOCIAL MEDICINE, PUBLIC HEALTH, Community child health < PAEDIATRICS, NUTRITION & DIETETICS, EPIDEMIOLOGY                                                                                                                                                                                                                                                                                                                                                                                                                                                                |
|                                 |                                                                                                                                                                                                                                                                                                                                                                                                                                                                                                                                                                          |

SCHOLARONE™  
Manuscripts



I, the Submitting Author has the right to grant and does grant on behalf of all authors of the Work (as defined in the below author licence), an exclusive licence and/or a non-exclusive licence for contributions from authors who are: i) UK Crown employees; ii) where BMJ has agreed a CC-BY licence shall apply, and/or iii) in accordance with the terms applicable for US Federal Government officers or employees acting as part of their official duties; on a worldwide, perpetual, irrevocable, royalty-free basis to BMJ Publishing Group Ltd ("BMJ") its licensees and where the relevant Journal is co-owned by BMJ to the co-owners of the Journal, to publish the Work in this journal and any other BMJ products and to exploit all rights, as set out in our [licence](#).

The Submitting Author accepts and understands that any supply made under these terms is made by BMJ to the Submitting Author unless you are acting as an employee on behalf of your employer or a postgraduate student of an affiliated institution which is paying any applicable article publishing charge ("APC") for Open Access articles. Where the Submitting Author wishes to make the Work available on an Open Access basis (and intends to pay the relevant APC), the terms of reuse of such Open Access shall be governed by a Creative Commons licence – details of these licences and which [Creative Commons](#) licence will apply to this Work are set out in our licence referred to above.

Other than as permitted in any relevant BMJ Author's Self Archiving Policies, I confirm this Work has not been accepted for publication elsewhere, is not being considered for publication elsewhere and does not duplicate material already published. I confirm all authors consent to publication of this Work and authorise the granting of this licence.



## Socioeconomic status, remoteness, and tracking of nutritional status from childhood to adulthood in an Australian Aboriginal Birth Cohort – the ABC study.

Pauline Sjöholm, MD<sup>1</sup> Katja Pahkala<sup>2</sup>, Belinda Davison<sup>3</sup>, Markus Juonala<sup>4</sup>, Gurmeet R Singh<sup>3,5</sup>

1 Department of Medicine; University of Turku, Turku, Finland.

This author takes responsibility for all aspects of the reliability and freedom from bias of the data presented and their discussed interpretation.

2 Research Centre of Applied and Preventive Cardiovascular Medicine, University of Turku, Turku, Finland; Paavo Nurmi Centre, Sports & Exercise Medicine Unit, Department of Physical Activity and Health, University of Turku, Turku, Finland

3 Menzies School of Health Research, Charles Darwin University, Darwin, Australia

4 Department of Medicine, University of Turku, Turku, Finland; Division of Medicine, Turku University Hospital, Turku, Finland; Murdoch Childrens Research Institute, Parkville, Victoria, Australia.

5 Northern Territory Medical Program, Flinders University, Darwin, Australia

**Conflicts of interest:** The authors report no relationships that could be construed as a conflict of interest.

**Contributorship statement:** P.S., K.P., B.D., G.S. and M.J. contributed to the analysis and interpretation of data. B.D. and G.S. were responsible for the design and implementation of the larger study of which this paper is a part. B.D. and G.S. collected and managed the data used in this study. P.S. wrote the paper with input from all authors. All authors approved of the final version to be submitted and agree to be accountable for all aspects of the work.

**Funding:** The authors received no specific funding for this paper

**Data sharing statement:** All data are stored confidentially and are not freely available in the public domain, but specific proposals for collaboration are welcomed. Collaborations are established through formal agreement with the ABC steering committee. Contact information: [abcstudy@menzies.edu.au](mailto:abcstudy@menzies.edu.au)

**Ethics statement:** This study was approved by the Human Research Ethics Committee of Northern Territory Department of Health and Menzies School of Health Research, including the Aboriginal Ethical Sub-committee which has the power of veto (ABC Reference no. 2013-2022). All research was performed in accordance with the National Health and Medical Research Council guidelines (National Statement on Ethical Conduct in Human Research, 2008). Informed written consent was obtained from all participants.

**Key words:** Nutritional Status, Indigenous, Socioeconomic

**Reprint request and correspondence:** Pauline Sjöholm, Department of Medicine, University of Turku, Kiinamyllynkatu 10, FIN-20520 Turku, Finland. E-mail [plsjoh@utu.fi](mailto:plsjoh@utu.fi)

1  
2  
3  
4  
5  
6  
7  
8  
9  
10  
11  
12  
13  
14  
15  
16  
17  
18  
19  
20  
21  
22  
23  
24  
25  
26  
27  
28  
29  
30  
31  
32  
33  
34  
35  
36  
37  
38  
39  
40  
41  
42  
43  
44  
45  
46  
47  
48  
49  
50  
51  
52  
53  
54  
55  
56  
57  
58  
59  
60

## ABSTRACT

**Objectives:** To determine prevalences of underweight and overweight as well as low and high waist-to-height ratio (WHtR) in three prospective follow-ups and to explore tracking of these measures of nutritional status from childhood to adolescence and adulthood. The influence of socioeconomic status, remoteness, maternal body mass index (BMI) and birth weight on weight status was assessed.

**Design:** Longitudinal birth cohort study of Indigenous Australians.

**Setting:** Data derived from three follow-ups of the Aboriginal Birth Cohort (ABC) study with mean ages of 11.4, 18.2 and 25.4 years for the participants.

**Participants:** Of the 686 Indigenous babies recruited to the study between 1987-1990, 315 had anthropometric measurements for all three follow-ups and were included in this study.

**Primary and secondary outcome measures:** Categories for BMI (underweight, normal weight, overweight and obesity) and WHtR (low and high), sex, areal socioeconomic disadvantage as defined by the Indigenous Relative Socioeconomic Outcomes index, urban/remote residence, maternal BMI, birth weight. Logistic regression was used to calculate odds ratios for belonging to a certain BMI category in adolescence and adulthood according to BMI category in childhood and adolescence.

**Results:** Underweight was common (38% in childhood and 24% in adulthood) and the prevalence of overweight/obesity increased with age (12% in childhood and 35% in adulthood). Both extremes of weight status as well as low and high WHtR tracked from childhood to adulthood. Underweight was more common and overweight less common in remote and more disadvantaged areas. Birth weight and maternal BMI were associated with later weight status. There were significant sex differences for prevalences and tracking of WHtR but not for BMI.

**Conclusions:** Socioeconomic factors, remoteness and gender must be addressed when assessing nutrition-related issues in the Indigenous communities due to the variation in nutritional status and its behaviour over time within the Indigenous population.

## ARTICLE SUMMARY

### Strengths and limitations of this study

- This cohort is the longest-running and largest Indigenous birth cohort in Australasia and presents unique data about the health of the contemporary Indigenous population.
- Despite logistic challenges relating to geography and accessibility, the retention rates were good.
- The present study offers novel findings about the geographical, socioeconomic and gender differences in nutritional status that should be addressed when developing new strategies to reduce the immense health inequalities in Australia.
- The study population was relatively small with a substantial amount of missing data.
- At this young age, the participants are healthy with very few showing overt disease, thus analysis of morbidity was not done. This will be addressed in future follow-ups.

## INTRODUCTION

The dual burden of simultaneous occurrence of obesity and underweight is a phenomenon commonly seen in low and middle-income countries but less so in high-income countries.[1]

The Indigenous (used respectfully to include both Aboriginal and Torres Strait Islander peoples) population in Australia has experienced a dramatic nutritional transition since European colonisation.[2] Indigenous Australians, especially those living in remote regions, are prone to a number of morbidities associated with non-favourable nutrition throughout life.[3] In 2012-2013, Indigenous Australians were 1.5 times as likely to be affected by obesity as non-Indigenous Australians, with 30% of Indigenous children aged 2-14 years and 66% of persons aged 15 and over being affected by overweight or obesity.[4] On the other hand, underweight was almost twice as common in childhood: 8% of Indigenous children were underweight compared with 4.8% of non-Indigenous children.[5] Obesity is a well documented risk factor for cardiovascular disease, type 2 diabetes, cancer and several other non-communicable diseases, [6-7] while underweight, a possible manifestation of malnutrition and nutritional deficiencies,[8] is also associated with raised infection risk[9] and pregnancy complications.[10] Both extremes of body composition are associated with substantial medical costs for the communities involved.[11] Overweight and obesity tend to 'track' from childhood to adulthood, i.e. remain relatively stable throughout an individual's lifecourse, according to studies conducted in non-Indigenous populations.[12] Tracking of underweight is a topic less studied, but has been reported in some cohorts.[13] There is a paucity of data in Indigenous children and adolescents regarding tracking of nutritional status.

In high-income countries, low socioeconomic status has been shown to be associated with obesity.[14] However, in low and middle income countries, the association is often reversed, and

1  
2  
3 persons of higher socioeconomic status are more likely to be affected by obesity.[15] The effects of  
4 socioeconomic factors and remoteness on nutritional status have generally been similar for the  
5  
6 Indigenous and the non-Indigenous Australians with obesity being concentrated in urban and less  
7  
8 disadvantaged areas.[4,16] To our knowledge, there have been no studies examining the  
9  
10 longitudinal development of nutritional status and its associations with socioeconomic factors in  
11  
12 very remote regions of Australia, where food insecurity is high [17] and malnutrition and  
13  
14  
15 underweight are more common.[18]

16  
17  
18  
19 The Aboriginal Birth Cohort (ABC) was formed to better understand the reasons behind the high  
20  
21 burden of disease of the Australian Indigenous population and identify possibilities for early  
22  
23 prevention. To date, the study is one of the longest running and largest Indigenous birth cohorts in  
24  
25 Australasia. The intention of this paper is 1) to explore tracking of nutritional status from childhood  
26  
27 to adulthood and 2) to explore the association of socioeconomic status and remoteness at birth with  
28  
29 later nutritional status in the cohort.  
30  
31  
32  
33  
34  
35  
36

## 37 **METHODS**

### 38 **Participants**

39  
40  
41  
42  
43 Details of the recruitment and follow-up of the ABC have been previously published in detail.[19-  
44  
45 20] In brief, between 1987 and 1990, 686 of the eligible 1238 babies born to Indigenous mothers at  
46  
47 the Royal Darwin Hospital were recruited into the study. There were no differences for mean birth  
48  
49 weights or sex ratios between those recruited and those not recruited. Since recruitment (Wave-1),  
50  
51 three follow-ups have been conducted: in childhood (Wave-2) at a mean age of 11.4 years (n=572;  
52  
53 86 % of living participants), in adolescence (Wave-3) at a mean age of 18.2 years (n=469; 71 % of  
54  
55 living participants) and most recently in early adulthood (Wave-4) at a mean age of 25.4 years  
56  
57 (n=459; 71 % of living participants).  
58  
59  
60

1  
2  
3 All procedures contributing to this work comply with the Helsinki Declaration of 1975, as revised  
4  
5 in 2008. All participants provided written informed consent to participate in this study, and all  
6  
7 procedures were approved by the Human Research Ethics Committee of the Northern Territory  
8  
9 Department of Health and the Menzies School of Health Research, including the Aboriginal Ethical  
10  
11 Sub-committee which has the power of veto.  
12  
13  
14  
15  
16  
17

### 18 **Patient and public involvement**

19  
20  
21 The study has clear commitment to engaging with Indigenous communities and building Indigenous  
22  
23 capacity. Indigenous researchers have been involved in all aspects of the study at each of the  
24  
25 follow-ups including investigators, data collection team and local community members employed as  
26  
27 research assistants, encouraging and facilitating formal research training. Extensive consultation  
28  
29 with expert, Indigenous and cohort reference groups was conducted prior to each follow-up to  
30  
31 obtain advice and guidance on contact methods, acceptability of planned procedures and methods of  
32  
33 feedback to individuals and communities. Due to the difficulty in providing individual feedback  
34  
35 after the initial visit, feedback is aimed at the community level in remote areas. Updates are  
36  
37 published in community newsletters and in the national Aboriginal and Islander Health Worker  
38  
39 Journal and provided to local community groups.  
40  
41  
42  
43  
44  
45  
46  
47

### 48 **Anthropometric measurements**

49  
50 At birth, maternal height and weight was recorded and used to calculate body mass index (BMI;  
51  
52 kg/m<sup>2</sup>) which was classified as underweight (< 18.5), normal weight (18.5-24.99), overweight (25-  
53  
54 29.99) or obese ( $\geq 30$ ). Birthweight of the participants was transformed into Z-scores and put into 5  
55  
56 categories based on the WHO child growth charts [21] 1) low: <-2; 2) low-normal: -2 to -1; 3)  
57  
58 normal: -1 to 1; 4) normal-high: 1 to 2; and 5) high >2.  
59  
60

1  
2  
3 At each follow-up of the study, a small group (3-4) of trained researchers measured height and  
4 weight using standardized methods. Weight was measured in light clothing while barefoot to the  
5 last complete 0.1 kg with a digital scale (TBF-521; Tanita Corporation, Arlington Heights, Illinois,  
6 USA). Height was measured with a portable stadiometer to the nearest millimeter. BMI was  
7 calculated as weight (kg) divided by height (m) squared. Waist circumference was measured to the  
8 nearest millimeter using a flexible tape measure at the midpoint between the lowest rib and iliac  
9 crest at the end of expiration.

10  
11 Participants were categorised in classes of nutritional status using two alternative classifications:  
12 Body mass index (BMI), a widely used estimate for defining weight status and waist-to-height ratio  
13 (WHtR), an alternative anthropometric measure to define adiposity.

14  
15 For participants who had attained 18 years at follow-up, the following BMI categories were used:  
16 underweight  $<18.5$ , normal weight 18.5-24.99, overweight 25-29.99, obese  $\geq 30$ . For participants  
17 who were under 18 years of age at time of follow-up, age and sex specific cut-off points were used  
18 for categories of weight status (underweight, normal weight, overweight and obese) as defined by  
19 the International Obesity Task Force.[22-23]

20  
21 WHtR has been suggested as a tool for better identifying abdominal obesity and delineating risk for  
22 cardiovascular disease and type 2 diabetes.[24] A cut-off value of 0.5 for WHtR has been  
23 commonly used for screening for cardio-metabolic risk irrespective of age, gender and  
24 ethnicity.[25-27] There is no consensus on a lower normal limit for WHtR, but a value of less than  
25 0.4 has also been previously used. WHtR was calculated as waist circumference in centimeters  
26 divided by height in centimeters and categorised as low ( $<0.4$ ), normal (0.4-0.49) or high  
27 ( $\geq 0.5$ ).[28]

28  
29  
30  
31  
32  
33  
34  
35  
36  
37  
38  
39  
40  
41  
42  
43  
44  
45  
46  
47  
48  
49  
50  
51  
52  
53  
54  
55  
56  
57  
58  
59  
60

### **Remoteness and childhood socioeconomic situation**

For areal socioeconomic disadvantage, the Indigenous Relative Socioeconomic Outcomes (IRSEO) index was used. The IRSEO is calculated at the Indigenous Area level and is based on 9 variables, 3 related to employment, 3 to education, 2 to housing and 1 to income, using information from the 2011 Census of Population and Housing. Each area is assigned to one of 100 percentiles, 1 for the most advantaged and 100 for the most disadvantaged.[29] Based on their reported addresses at birth, the participants were assigned an IRSEO score. The scores were categorised into three groups: low disadvantage (1 to 40), mid-high disadvantage (range 41 to 90), and high disadvantage (range 91 to 100).

Area of residence was classified at birth, with families residing in a rural community with an Aboriginal council classified as “remote” and all “non-remote” locations were classified as “urban”. At Wave-4, 18 % of participants reported to have lived in another community at some point in their lives. However, limited movement between urban and remote settings was seen, with 8.7 % of participants who had lived in a remote community at birth moving to an urban community by Wave-4 and 19 % of the participants who had lived in an urban community at Wave-2 moving to a remote location at by Wave-4.

### **Statistical analyses**

Participants who were pregnant in Wave-3 and/or Wave-4 were excluded from the analyses. Only participants who had height, weight and waist circumference recorded at all follow-ups were included (N=315). Overweight and obesity were combined into one category due to small numbers. Attrition analyses were performed to compare baseline characteristics between participants included and not included at each follow-up with t-tests for continuous and chi-square tests for categorical



1  
2  
3 variables. Chi-square tests were used to assess the association of weight status and categories of  
4  
5 remoteness, socioeconomic status, maternal BMI and birth weight at all follow-ups separately.  
6  
7

8 Tracking of nutritional status (underweight, overweight/obese and WHtR, low and high) was  
9  
10 analysed using logistic regression and reported as odds ratio (OR) of status being constant across  
11  
12 time: status in childhood continuing into adolescence and adulthood and status in adolescence  
13  
14 continuing into adulthood. Regression analyses were adjusted for age at follow-up, sex and time  
15  
16 between compared follow-ups  
17  
18

19  
20 To assess the changes over time, Cochran's Q tests and McNemar's tests were used to analyse the  
21  
22 differences in the proportions of nutritional status categories by sex over the course of the three  
23  
24 follow-ups.  
25  
26

27  
28 Statistical tests were performed with SAS version 9.4 (SAS Institute, Inc, Cary, NC). Statistical  
29  
30 significance was inferred at a 2-tailed P-value < 0.05.  
31  
32

## 33 34 35 36 **Results**

37  
38 Complete data (height, weight and waist circumference) at all follow-ups were available on 315  
39  
40 participants. There were no significant differences in sex, birth weight and maternal BMI in  
41  
42 participants included and those not included. There were significant differences between the two  
43  
44 groups regarding remoteness and areal disadvantage: those included were more from remote and  
45  
46 more disadvantaged areas according to IRSEO scores (see supplementary table 1). There were no  
47  
48 significant differences between the BMI or the WHtR values at any follow-up between participants  
49  
50 included and those not included (for BMI: P=0.48 for Wave-2 and Wave-3, P=0.47 for Wave-4; for  
51  
52 WHtR P=0.5, 0.46 and 0.52 respectively). Descriptive statistics of the participants are presented in  
53  
54 table 1.  
55  
56  
57  
58  
59  
60

*Anthropometric characteristics of participants*

|                                | <b>Childhood (Wave-2)</b> |               | <b>Adolescence (Wave-3)</b> |               | <b>Adulthood (Wave-4)</b> |               |
|--------------------------------|---------------------------|---------------|-----------------------------|---------------|---------------------------|---------------|
|                                | <i>Male</i>               | <i>Female</i> | <i>Male</i>                 | <i>Female</i> | <i>Male</i>               | <i>Female</i> |
| <b>Age, years ± SD</b>         | 11.1 ± 1.1                | 10.8 ± 1.1    | 17.9 ± 1.1                  | 17.7 ± 1.1    | 25.4 ± 1.1                | 25.2 ± 1.2    |
| <b>Weight, kg</b>              | 34.3 ± 11.5               | 35.2 ± 11.5   | 64.1 ± 20.2                 | 53.7 ± 13.0   | 71.1 ± 21.2               | 60.6 ± 16.0   |
| <b>Height, cm</b>              | 143.1 ± 10.1              | 143.0 ± 10.5  | 173.3 ± 6.9                 | 161.3 ± 5.2   | 174.3 ± 7.0               | 161.4 ± 5.6   |
| <b>BMI</b>                     | 16.4 ± 3.5                | 16.8 ± 3.4    | 21.2 ± 5.6                  | 20.7 ± 4.9    | 23.3 ± 6.0                | 23.3 ± 6.2    |
| <b>Waist circumference, cm</b> | 63.8 ± 9.5                | 63.9 ± 9.0    | 78.8 ± 14.5                 | 77.7 ± 12.6   | 85.7 ± 16.0               | 86.2 ± 15.1   |
| <b>WHtR</b>                    | 0.45 ± 0.05               | 0.45 ± 0.05   | 0.45 ± 0.08                 | 0.48 ± 0.08   | 0.49 ± 0.09               | 0.54 ± 0.1    |

*Birth characteristics of participants*

|                                   | <i>Male</i> | <i>Female</i> | <i>Total</i>        |
|-----------------------------------|-------------|---------------|---------------------|
| <b>N</b>                          | 158 (50.2%) | 157 (40.8%)   | 315                 |
| <b>Urban residence, %</b>         | 13.3        | 8.3           | 10.8 (N=315)        |
| <b>Birth weight, Z score ± SD</b> | -0.16 ± 1.2 | -0.42 ± 1.1   | -0.29 ± 1.1 (N=293) |
| <b>IRSEO score</b>                | 78.6 ± 23.9 | 83.0 ± 19.7   | 80.8 ± 22.0 (N=315) |
| <b>BMI of mother</b>              | 22.0 ± 3.8  | 22.6 ± 4.4    | 22.3 ± 4.1 (N=236)  |

**Table 1.** Descriptive characteristics. Mean values with standard deviations for anthropometric measurements of participants in three follow-ups and baseline characteristics.

1  
2  
3 High rates of underweight were seen at all 3 follow-ups: 38.1 % at Wave-2, 38.1 % at Wave-3 and  
4  
5 23.5 % at Wave-4. Overweight and obesity increased over time: for overweight, 8.9 % at Wave-2,  
6  
7 12.1% at Wave-3 and 22.9 % at Wave-4, and for obesity, 2.9 %, 6.4 % and 11.8 % respectively.

8  
9  
10 Prevalences of BMI categories according to sex are presented in figure 1. There were no significant  
11  
12 differences between the sexes in the prevalence of underweight, overweight or obesity.

13  
14  
15 The differences in weight status over the course of the three follow-ups were significant ( $P < 0.0001$   
16  
17 for underweight and overweight/obesity for both sexes). There was no statistically significant  
18  
19 difference in the rate of underweight between Wave-2 and Wave-3 ( $P = 0.56$  for males and  $P = 0.76$   
20  
21 for females) but a significant difference in the prevalence of underweight between Wave-2 and  
22  
23 Wave-4 ( $P < 0.0001$  for both sexes) as well as between Wave-3 and Wave-4 ( $P < 0.0001$  for both  
24  
25 sexes). For the prevalences of overweight/obesity, there was a statistically significant difference  
26  
27 between Wave-2 and Wave-3 for male participants but not for females ( $P = 0.002$  for males and  
28  
29  $P = 0.16$  for females). Between Wave-2 and Wave-4 the difference was statistically significant for  
30  
31 both sexes ( $P < 0.0001$ ) as well as between Wave-3 and Wave-4 ( $P = 0.0007$  for males and  $P < 0.0001$   
32  
33 for females).

34  
35  
36  
37  
38 Prevalences of low ( $< 0.4$ ) and high ( $\geq 0.5$ ) WHtR in the three follow-ups are presented in figure 2.

39  
40  
41 There were no differences between the sexes at Wave-2. In later follow-ups, male participants more  
42  
43 often had a low WHtR (22.2 vs. 10.2 % at Wave-3 [ $P = 0.004$ ] and 13.9 vs. 5.1 % at Wave-4  
44  
45 [ $P = 0.008$ ]) while female participants more often had a high WHtR (34.4 vs. 20.9 % at Wave-3  
46  
47 [ $P = 0.007$ ] and 58.6 vs. 36.1 % at Wave-4 [ $P < 0.0001$ ]). The changes in WHtR over the course of the  
48  
49 three follow-ups were significant ( $P = 0.002$  for males and  $P = 0.03$  for females for low WHtR and  
50  
51  $P < 0.0001$  for both sexes for high WHtR). Between Wave-2 and Wave-3, there was a statistically  
52  
53 significant difference between the rates for low WHtR for males ( $P = 0.003$ ) but not for females  
54  
55 ( $P = 0.4$ ). Between Wave-2 and Wave-4 the difference was significant for females ( $P = 0.01$ ) but not  
56  
57 for males ( $P = 0.4$ ). For high WHtR, the difference was significant between Wave-2 and Wave-3  
58  
59  
60

1  
2  
3 (P=0.002 for males and P<0.0001 for females) and between Wave-2 and Wave-4 (P<0.0001 for  
4  
5 both sexes).  
6  
7

8 The associations between weight class and remoteness, maternal BMI, areal disadvantage (IRSEO)  
9  
10 and birth weight are presented in figure 3. Urban participants were significantly more likely to be  
11  
12 overweight/obese and less likely to be underweight than remote participants in all follow-ups. Areal  
13  
14 socioeconomic disadvantage was significantly associated with weight class in all follow-ups:  
15  
16 participants from more disadvantaged areas were more often underweight and less often  
17  
18 overweight/obese than participants from less disadvantaged areas. Maternal weight status was  
19  
20 significantly associated with offspring weight status in all follow-ups with children of underweight  
21  
22 mothers being more often underweight and children of overweight and obese mothers more often  
23  
24 presenting with overweight and obesity. Birth weight was also associated with later weight status:  
25  
26 smaller babies were more often underweight and less often overweight or obese in all follow-ups.  
27  
28 The association was significant in all follow-ups except for overweight status at Wave-2 (P=0.06)  
29  
30 and underweight status at Wave-3 (P=0.06).  
31  
32  
33  
34  
35

36 Analyses of tracking of weight status according to BMI categories are presented in table 2. Tracking  
37  
38 was significant between age groups for all BMI categories, with sex not a significant confounder in  
39  
40 any of the analyses. Of the participants who were overweight/obese at Wave-2, 67.6% remained in  
41  
42 the same weight status category at Wave-3 (OR 16.0, P < 0.0001) and 83.8% at Wave-4 (OR 9.8, P  
43  
44 < 0.0001). Of the participant who were overweight/obese at Wave-3, 86.2% continued to be  
45  
46 overweight/obesity at Wave-4 (OR 22.5, P < 0.0001). Underweight status was also significantly  
47  
48 stable throughout the follow-ups. Of the participants who were underweight at Wave-2, 76.7% were  
49  
50 underweight at Wave-3 (OR 22.6, P < 0.0001) and 46.7% remained underweight at Wave-4 (OR  
51  
52 9.8, P < 0.0001). Of underweight participants at Wave-3, 83.8% were underweight at Wave-4 (OR  
53  
54 17.3, P < 0.0001).  
55  
56  
57  
58  
59  
60

1  
2  
3 There was significant tracking of both low and high WHtR in all follow-ups. Sex was a significant  
4 confounder in most analyses (table 3) with tracking of low WHtR being more likely for male  
5 participants and tracking of high WHtR more likely for female participants. Of the participants who  
6 had a low WHtR at Wave-2, 44.7% remained in the same category at Wave-3 (OR 6.9,  $P < 0.0001$ )  
7 and 23.7% at Wave-4 (OR 4.5,  $P=0.001$ ) while 46.7% of participants with a low WHtR at Wave-3  
8 having a low WHtR at Wave-4 (OR 45.1,  $P < 0.0001$ ). Of the participants with a high WHtR at  
9 Wave-2, 71.1% had a high WHtR at Wave-3 (OR 9.3,  $P<0.0001$ ) and 94.7% at Wave-4 (OR 28.6,  $P$   
10  $<0.0001$ ). Of the participants with a high WHtR at Wave-3, 85.1% remained in the same category at  
11 Wave-4 (OR 11.3,  $P<0.0001$ ).  
12  
13  
14  
15  
16  
17  
18  
19  
20  
21  
22  
23  
24  
25  
26  
27

### 28 **Sensitivity analyses**

29  
30 To test for bias due to the large amount of people not included, sensitivity analyses were performed  
31 for tracking analyses for all plausible values for the whole cohort. Logistic regression analyses  
32 adjusted for sex, age at follow-up and time between follow-ups determined that tracking of  
33 overweight/obesity was significant from Wave-2 to Wave-3 ( $P<0.0001$ , OR=17.3) and Wave-4  
34 ( $P<0.0001$ , OR=16.1) as well as from Wave-3 to Wave-4 ( $P<0.0001$ , OR=18.7). Tracking was also  
35 significant for underweight from Wave-2 to Wave-3 ( $P<0.0001$ , OR=15.8) and to Wave-4  
36 ( $P=0.003$ , OR=4.1) and from Wave-3 to Wave-4 ( $P<0.0001$ , OR=11.2). High WHtR tracked from  
37 Wave-2 to Wave-3 ( $P<0.0001$ , OR=9.9) and to Wave-4 ( $P<0.0001$ , OR=21.8) and from Wave-3 to  
38 Wave-4 ( $P<0.0001$ , OR=7.9). Low WHtR tracked from Wave-2 to Wave-3 ( $P=0.002$ , OR=2.6) and  
39 to Wave-4 ( $P=0.005$ , OR=2.4) and from Wave-3 to Wave-4 ( $P<0.0001$ , OR=7.8).  
40  
41  
42  
43  
44  
45  
46  
47  
48  
49  
50  
51  
52  
53  
54  
55  
56  
57  
58  
59  
60

1  
2  
3  
4  
5  
6  
7  
8  
9  
10  
11  
12  
13  
14  
15  
16  
17  
18  
19  
20  
21  
22  
23  
24  
25  
26  
27  
28  
29  
30  
31  
32  
33  
34  
35  
36  
37  
38  
39  
40  
41  
42  
43  
44  
45  
46

**Table 2.** Associations between weight classes at different timepoints

|                             |                  | Adolescence (Wave-3) |                  |         |                  |                 |         | Adulthood (Wave-4) |                  |         |                  |                   |         |
|-----------------------------|------------------|----------------------|------------------|---------|------------------|-----------------|---------|--------------------|------------------|---------|------------------|-------------------|---------|
|                             |                  | Underweight          |                  |         | Overweight/obese |                 |         | Underweight        |                  |         | Overweight/obese |                   |         |
|                             |                  | %                    | OR (CI)          | P-value | %                | OR(CI)          | P-value | %                  | OR (CI)          | P-value | %                | OR (CI)           | P-value |
| <b>Childhood (Wave-2)</b>   | Underweight      | 76.7%                | 22.6 (12.2-42.0) | <0.0001 | 0%               | -               | -       | 46.7%              | 9.8 (5.2-18.6)   | <0.0001 | 8.3%             | 0.09 (0.04-0.2)   | <0.0001 |
|                             | Normal weight    | 17.7%                | 0.15 (0.09-0.3)  | <0.0001 | 20.9%            | 1.4 (0.8-2.5)   | 0.25    | 10.8%              | 0.2 (0.1-0.4)    | <0.0001 | 43.0%            | 2.1 (1.3-3.5)     | 0.002   |
|                             | Overweight/obese | 0%                   | -                | -       | 67.6%            | 16.0 (7.1-35.7) | <0.0001 | 2.7%               | 0.07 (0.009-0.5) | 0.0095  | 83.8%            | 13.2 (5.3-33.0)   | <0.0001 |
| <b>Adolescence (Wave-3)</b> | Underweight      | -                    | -                | -       | -                | -               | -       | 83.8%              | 17.3 (8.5-35.2)  | <0.0001 | 3.3%             | 0.03 (0.009-0.08) | <0.001  |
|                             | Normal weight    | -                    | -                | -       | -                | -               | -       | 16.2%              | 0.2 (0.09-0.34)  | <0.0001 | 40.2%            | 1.6 (0.98-2.5)    | 0.06    |
|                             | Overweight/obese | -                    | -                | -       | -                | -               | -       | 0%                 | -                | -       | 86.2%            | 22.5 (10.0-51.0)  | <0.0001 |

Tracking of weight classes from childhood and adolescence to adolescence and adulthood, eg. of the children who were underweight at first follow-up, 76.7% remained underweight in adolescence and 46.7 % in adulthood.  
 Weight classes for participants < 18 years of age based on age and sex specific BMI cut-off points according to Cole et al. (2000, 2007). For adults: underweight BMI < 18.5; normal weight BMI 18.5-24.99; overweight/obese BMI ≥ 25.  
 OR adjusted for age (years) at earlier follow-up, time (years) between follow-ups and sex. % indicates percent of participants in weight class at later follow-up.

**Table 3.** Associations between low and high WHtR at different time points

|                      | Adolescence (Wave-3) |         |                |            |                 |            |        |                  |            |                 | Adulthood (Wave-4) |         |                  |            |                 |            |        |                  |            |                 |         |
|----------------------|----------------------|---------|----------------|------------|-----------------|------------|--------|------------------|------------|-----------------|--------------------|---------|------------------|------------|-----------------|------------|--------|------------------|------------|-----------------|---------|
|                      | WHtR < 0.4           |         |                |            |                 | WHtR ≥ 0.5 |        |                  |            |                 | WHtR < 0.4         |         |                  |            |                 | WHtR ≥ 0.5 |        |                  |            |                 |         |
|                      | %                    | OR (CI) | P-value        | OR for sex | P-value for sex | %          | OR(CI) | P-value          | OR for sex | P-value for sex | %                  | OR (CI) | P-value          | OR for sex | P-value for sex | %          | OR(CI) | P-value          | OR for sex | P-value for sex |         |
| Childhood (Wave-2)   | WHtR < 0.4           | 44.7    | 6.9 (3.2-15.1) | <0.0001    | 3.2 (1.6-6.4)   | 0.001      | 2.6    | 0.05 (0.007-0.4) | 0.004      | 0.4 (0.3-0.7)   | 0.002              | 23.7    | 4.5 (1.8-11.4)   | 0.001      | 3.5 (1.5-8.6)   | 0.005      | 21.1   | 0.2 (0.1-0.5)    | 0.0005     | 0.4 (0.2-0.6)   | <0.0001 |
|                      | WHtR ≥ 0.5           | 0.0     | -              | -          | -               | -          | 71.1   | 9.3 (4.2-20.4)   | <0.0001    | 0.5 (0.3-0.8)   | 0.005              | 0.0     | -                | -          | -               | -          | 94.7   | 28.6 (6.6-122.9) | <0.0001    | 0.4 (0.2-0.6)   | <0.0001 |
| Adolescence (Wave-4) | WHtR < 0.4           | -       | -              | -          | -               | -          | -      | -                | -          | -               | -                  | 45.1    | 26.7 (10.3-69.2) | <0.0001    | 2.0 (0.8-5.3)   | 0.2        | 9.8    | 0.1 (0.04-0.3)   | <0.0001    | 0.5 (0.3-0.7)   | 0.001   |
|                      | WHtR ≥ 0.5           | -       | -              | -          | -               | -          | -      | -                | -          | -               | -                  | 0.0     | -                | -          | -               | -          | 85.1   | 11.3 (5.8-21.9)  | <0.0001    | 0.5 (0.3-0.8)   | 0.003   |

Tracking of waist-to-height ratio from childhood and adolescence to adolescence and adulthood. OR adjusted for age (years) at earlier follow-up, time (years) between follow-ups and sex. OR for sex modeled as male vs female. % indicates per cent of participants in WHtR at later follow-up.

## DISCUSSION

In this Indigenous cohort, underweight was common from childhood through to adolescence and young adulthood. Overweight/obesity was relatively less common but increased across time. This is in contrast to the general Australian Indigenous population, where rates of overweight and obesity are higher. It may reflect the cohort demographics with many people residing in remote and very remote communities.

There is significant tracking of nutritional status from childhood to adulthood among Indigenous Australians in this cohort, both when assessed with BMI or WHtR categories. In contrast to BMI, there were significant differences between the sexes for both tracking and prevalence of WHtR categories with females more often presenting with central adiposity in adolescence and adulthood. This finding is consistent with previous studies that show that Indigenous women in general have greater waist circumference than their non-Indigenous counterparts.[30-31] We have previously reported that females in this cohort have lower levels of physical activity, which may be a possible contributing factor.[32] Central adiposity is a known risk factor for cardiovascular morbidity which accounts for a substantial part of the disparity in health outcomes between Indigenous and non-Indigenous Australians. Therefore, women seem to be at particular risk for chronic disease due to their body fat composition.[31]

Both areal disadvantage and remote residence were associated with lower prevalence of overweight/obesity and higher rates of underweight. This is in contrast to a study from New South Wales that examined Indigenous people aged 45 and older, where participants from more advantaged and urban surroundings had lower prevalences of obesity and overweight than those from remote and disadvantaged areas [16]. In a previous study from the ABC, a significant association was found between remoteness and areal disadvantage at birth and longitudinal development of BMI measured at the same follow-ups as the present study. [33] It seems that the



1  
2  
3 spatial trend in obesity in this cohort is similar to that traditionally seen in low and middle income  
4 countries, where obesity is more concentrated in cities and wealthier regions and underweight is  
5 more common in remote and rural settings. [1] The dual burden of malnutrition and the urban-  
6 remote differential in nutritional status has been previously described in the cohort at an average  
7 age of 25 years.[34]  
8  
9

10  
11  
12 The association between maternal BMI and offspring BMI is consistent with previous studies  
13 conducted in non-Indigenous cohorts. In the Generation R study, it was found that maternal obesity  
14 is associated with adverse cardiometabolic risk profiles including obesity, higher systolic blood  
15 pressure and adverse lipid levels in the offspring at the age of six years.[35] In the Avon  
16 Longitudinal Study of Parents and Children (ALSPAC), a linear trend between maternal pre-  
17 pregnancy BMI and offspring adiposity levels was found: offspring of underweight mothers had  
18 lower rates and offspring of overweight mothers had higher rates of adiposity at 7.5 and 17.2 years.  
19 DNA methylation was suggested as a mediating factor.[36]  
20  
21  
22  
23  
24  
25  
26  
27  
28  
29  
30  
31  
32  
33

34 From a public health point of view, the present paper presents further evidence that dietary  
35 interventions need more tailored approaches, as there exist large variations within the Indigenous  
36 communities regarding nutritional status and its behaviour over time. Interventions need to be  
37 delivered within critical time windows and the gender perspective is essential: pre-pregnant women  
38 and girls in general should receive special attention. [37] The reasons behind the dual burden of  
39 malnutrition, particularly the high rates of underweight in the remote and more disadvantaged  
40 communities, are multifactorial and include high food prices, low incomes, overcrowded  
41 households and rudimentary cooking facilities [38-39]. Approaches that have been suggested to  
42 improve diet in the remote communities include eliminating socioeconomic constraints by reducing  
43 prices on fruit and vegetables in the community stores and enhancing nutrition-related consumer  
44 education and thus improving food security and self-efficacy to cook. [40] Nutrition education  
45 including cooking skills workshops, group education sessions and store interventions have been  
46  
47  
48  
49  
50  
51  
52  
53  
54  
55  
56  
57  
58  
59  
60

1  
2  
3 reported to have some positive effect on obesity in Indigenous communities according to a review  
4 study that included both remote and urban communities in Australia [41]. Multi-sector participatory  
5 approaches to strengthen food systems in remote Indigenous communities are needed [42] with a  
6 special focus on nutrition in the early life.  
7  
8  
9  
10  
11

12  
13 The strengths of the study include its longitudinal design and well-structured follow-ups with  
14 relatively good retention rates. The study population however is relatively small causing some  
15 limitations to the interpretation of the results and as only participants with data from all follow-ups  
16 were included, the missing data was quite substantial. However, the results from the sensitivity  
17 analyses where all data points were analysed were similar to the analyses presented. There were  
18 significant geographical differences between participants and non-participants, with participants  
19 being more often from non-urban and more disadvantaged areas. This potential bias may exaggerate  
20 the prevalences for underweight in the cohort as underweight was more prevalent in the remote and  
21 disadvantaged regions. The presented associations between weight status and socioeconomic status,  
22 remoteness, maternal BMI and birth weight are merely descriptive analyses presented separately for  
23 each follow-up as the data was not analysed in a longitudinal fashion and correlation over time was  
24 not assessed as this was not the main aim of the article. Other limitations include the definition of  
25 socioeconomic status, as the individual level indicators of socioeconomic status such as income  
26 were not available. IRSEO describes socioeconomic disadvantage on an area level and may not  
27 reflect the individual situation of the participants. Finally, the participants were still young during  
28 the last follow-up. After future follow-ups, cardiovascular morbidity and clinical events are likely to  
29 be more prevalent and could be analysed for even better understanding of the clinical relevance of  
30 the nutritional status and obesity trends in this cohort.  
31  
32  
33  
34  
35  
36  
37  
38  
39  
40  
41  
42  
43  
44  
45  
46  
47  
48  
49  
50  
51  
52  
53

54  
55 In summary, this study presents strong evidence on tracking of nutritional status from childhood to  
56 adulthood in this unique Indigenous cohort. Socioeconomic status and remoteness factors were  
57 associated with weight status in all follow-ups. The high prevalence of underweight across all age  
58  
59  
60

1  
2  
3 groups requires special attention in the process of improving nutritional health in the remote  
4  
5 Indigenous communities. The differences in central adiposity between males and females that seem  
6  
7 to arise after childhood indicate a need for targeted and successfully timed approaches in dietary  
8  
9 interventions.  
10  
11  
12  
13  
14  
15  
16  
17  
18  
19  
20  
21  
22  
23  
24  
25  
26  
27  
28  
29  
30  
31  
32  
33  
34  
35  
36  
37  
38  
39  
40  
41  
42  
43  
44  
45  
46  
47  
48  
49  
50  
51  
52  
53  
54  
55  
56  
57  
58  
59  
60

For peer review only

1  
2  
3  
4  
5  
6  
7  
8  
9  
10  
11  
12  
13  
14  
15  
16  
17  
18  
19  
20  
21  
22  
23  
24  
25  
26  
27  
28  
29  
30  
31  
32  
33  
34  
35  
36  
37  
38  
39  
40  
41  
42  
43  
44  
45  
46  
47  
48  
49  
50  
51  
52  
53  
54  
55  
56  
57  
58  
59  
60

## FIGURE LEGENDS

**Figure 1.** Percentages of underweight and overweight/obese participants by sex. For classification, age and sex specific cut-off points were used for participants under 18 years of age at follow-up. For participants aged 18 and over, underweight was classified as BMI < 18,5; normal weight as 18,5-24,99; overweight as 25-29,99 and obesity as  $\geq 30$ .

**Figure 2.** Prevalences for low and high waist-to-height ratio at three time points according to sex. P-values are calculated with chi-square tests and represent differences between sexes. Values are in percentages.

**Figure 3.** Prevalences of overweight/obesity and underweight in participants according to urban residence (A), maternal BMI (B), areal disadvantage (C), and birth weight (D). Chi-square tests were used to assess association between weight status and presented categories.

## References

- [1] B. M. Popkin, L. S. Adair, and S. W. Ng, "Global nutrition transition and the pandemic of obesity in developing countries," *Nutr. Rev.*, vol. 70, no. 1, pp. 3–21, Jan. 2012.
- [2] M. Ferguson, C. Brown, C. Georga, E. Miles, A. Wilson, and J. Brimblecombe, "Traditional food availability and consumption in remote Aboriginal communities in the Northern Territory, Australia," *Aust. N. Z. J. Public Health*, vol. 41, no. 3, pp. 294–298, Jun. 2017.
- [3] J. K. Brimblecombe, M. M. Ferguson, S. C. Liberato, and K. O'Dea, "Characteristics of the community-level diet of Aboriginal people in remote northern Australia," *Med. J. Aust.*, vol. 198, no. 7, pp. 380–384, Apr. 2013.
- [4] Australian Bureau of Statistics, "Australian Aboriginal and Torres Strait Islander Health Survey: First Results." ABS, Canberra, 2013.
- [5] AIHW, "The health and welfare of Australia's Aboriginal and Torres Strait Islander peoples: 2015. Cat. no. IHW 147. Canberra: AIHW.," 2015.
- [6] Expert Panel Members *et al.*, "Executive summary: Guidelines (2013) for the management of overweight and obesity in adults: A Report of the American College of Cardiology/American Heart Association Task Force on Practice Guidelines and The Obesity Society Published by The O," *Obesity*, vol. 22, no. S2, pp. S5–S39, Jul. 2014.
- [7] P. W. Franks, R. L. Hanson, W. C. Knowler, M. L. Sievers, P. H. Bennett, and H. C. Looker, "Childhood Obesity, Other Cardiovascular Risk Factors, and Premature Death," *N. Engl. J. Med.*, vol. 362, no. 6, pp. 485–493, Feb. 2010.
- [8] W. Cai, "Nutritional challenges for children in societies in transition:," *Curr. Opin. Clin. Nutr. Metab. Care*, vol. 17, no. 3, pp. 278–284, May 2014.
- [9] J. Dobner and S. Kaser, "Body mass index and the risk of infection - from underweight to obesity," *Clin. Microbiol. Infect.*, vol. 24, no. 1, pp. 24–28, Jan. 2018.
- [10] A. Cristina Rossi, "Underweight and pregnancy," *BJOG Int. J. Obstet. Gynaecol.*, vol. 123, no. 12, pp. 2008–2008, Nov. 2016.
- [11] M. E. Hoque, M. Mannan, K. Z. Long, and A. A. Mamun, "Economic burden of underweight and overweight among adults in the Asia-Pacific region: a systematic review," *Trop. Med. Int. Health*, vol. 21, no. 4, pp. 458–469, Apr. 2016.
- [12] A. S. Singh, C. Mulder, J. W. R. Twisk, W. Van Mechelen, and M. J. M. Chinapaw, "Tracking of childhood overweight into adulthood: a systematic review of the literature: Tracking of childhood overweight into adulthood," *Obes. Rev.*, vol. 9, no. 5, pp. 474–488, Mar. 2008.
- [13] J. de Wilde, B. Middelkoop, and P. Verkerk, "Tracking of thinness and overweight in children of Dutch, Turkish, Moroccan and South Asian descent from 3 through 15 years of age: a historical cohort study," *Int. J. Obes.*, vol. 42, no. 6, pp. 1230–1238, Jun. 2018.
- [14] M. Devaux and F. Sassi, "Social inequalities in obesity and overweight in 11 OECD countries," *Eur. J. Public Health*, vol. 23, no. 3, pp. 464–469, Jun. 2013.
- [15] G. D. Dinsa, Y. Goryakin, E. Fumagalli, and M. Suhrcke, "Obesity and socioeconomic status in developing countries: a systematic review: Obesity and socio-economic status in developing countries," *Obes. Rev.*, vol. 13, no. 11, pp. 1067–1079, Nov. 2012.
- [16] K. A. Thurber *et al.*, "Obesity and its association with sociodemographic factors, health behaviours and health status among Aboriginal and non-Aboriginal adults in New South Wales, Australia," *J. Epidemiol. Community Health*, vol. 72, no. 6, pp. 491–498, Jun. 2018.
- [17] Australian Bureau of Statistics, "Australian Aboriginal and Torres Strait Islander Health Survey: Nutrition Results - Food and Nutrients, 2012-13." Canberra: ABS, 2015.
- [18] N. F. Morris, S. Stewart, M. D. Riley, and G. P. Maguire, "The burden and nature of malnutrition among patients in regional hospital settings: A cross-sectional survey," *Clin. Nutr. ESPEN*, vol. 23, pp. 1–9, Feb. 2018.
- [19] S. M. Sayers, D. Mackerras, G. Singh, I. Bucens, K. Flynn, and A. Reid, "An Australian Aboriginal birth cohort: a unique resource for a life course study of an Indigenous population. A study protocol," *BMC Int. Health Hum. Rights*, vol. 3, no. 1, p. 1, Mar. 2003.

- 1  
2  
3 [20] S. Sayers *et al.*, "Australian Aboriginal Birth Cohort study: follow-up processes at 20 years," *BMC Int. Health Hum. Rights*, vol. 9, p. 23, Sep. 2009.
- 4  
5 [21] World Health Organization, "WHO child growth standards." .
- 6  
7 [22] T. J. Cole, "Establishing a standard definition for child overweight and obesity worldwide: international survey," *BMJ*, vol. 320, no. 7244, pp. 1240–1240, May 2000.
- 8  
9 [23] T. J. Cole, K. M. Flegal, D. Nicholls, and A. A. Jackson, "Body mass index cut offs to define thinness in children and adolescents: international survey," *BMJ*, vol. 335, no. 7612, p. 194, Jul. 2007.
- 10  
11 [24] M. Ashwell, P. Gunn, and S. Gibson, "Waist-to-height ratio is a better screening tool than waist circumference and BMI for adult cardiometabolic risk factors: systematic review and meta-analysis: Waist-to-height ratio as a screening tool," *Obes. Rev.*, vol. 13, no. 3, pp. 275–286, Mar. 2012.M.
- 12  
13 [25] V. M. Kuba, C. Leone, and D. Damiani, "Is waist-to-height ratio a useful indicator of cardio-metabolic risk in 6-10-year-old children?," *BMC Pediatr.*, vol. 13, no. 1, Dec. 2013.
- 14  
15 [26] L. M. Browning, S. D. Hsieh, and M. Ashwell, "A systematic review of waist-to-height ratio as a screening tool for the prediction of cardiovascular disease and diabetes: 0.5 could be a suitable global boundary value," *Nutr. Res. Rev.*, vol. 23, no. 02, pp. 247–269, Dec. 2010.
- 16  
17 [27] Khoury, C. Manlhiot, and B. W. McCrindle, "Role of the Waist/Height Ratio in the Cardiometabolic Risk Assessment of Children Classified by Body Mass Index," *J. Am. Coll. Cardiol.*, vol. 62, no. 8, pp. 742–751, Aug. 2013.
- 18  
19 [28] Y. Zhang, Z. Wang, Z. Chu, and J. Zhao, "Profiles of body mass index and the nutritional status among children and adolescents categorized by waist-to-height ratio cut-offs," *Int. J. Cardiol.*, vol. 223, pp. 529–533, Nov. 2016.
- 20  
21 [29] N. Biddle, "CAEPR Indigenous Population Project: 2011 Census Papers. Paper 13. Socioeconomic outcomes.," Centre for Aboriginal Economic Policy Research, The Australian National University., Canberra, 2013.
- 22  
23 [30] L. S. Piers, K. G. Rowley, M. J. Soares, and K. O'Dea, "Relation of adiposity and body fat distribution to body mass index in Australians of Aboriginal and European ancestry," *Eur. J. Clin. Nutr.*, vol. 57, no. 8, pp. 956–963, Aug. 2003.
- 24  
25 [31] O. O. Adegbiya and Z. Wang, "Gender variations in waist circumference levels between Aboriginal and non-Aboriginal Australian populations: A systematic review," *Obes. Res. Clin. Pract.*, vol. 8, no. 6, pp. e513–e524, Nov. 2014.
- 26  
27 [32] P. Sjöholm, K. Pahkala, B. Davison, M. Juonala, and G. R. Singh, "Early life determinants of cardiovascular health in adulthood. The Australian Aboriginal Birth Cohort study," *Int. J. Cardiol.*, vol. 269, pp. 304–309, Oct. 2018.
- 28  
29 [33] M. Juonala *et al.*, "The Australian Aboriginal Birth Cohort study: socio-economic status at birth and cardiovascular risk factors to 25 years of age," *Med. J. Aust.*, vol. 211, no. 6, pp. 265–270, Sep. 2019.
- 30  
31 [34] B. Davison, J. Goodall, S. Whalan, K. Montgomery-Quin, T. Howarth, and G. Singh, "Nutritional dual burden in Indigenous young adults: The geographical differential," *Aust. J. Rural Health*, vol. 27, no. 1, pp. 14–21, Feb. 2019.
- 32  
33 [35] R. Gaillard *et al.*, "Childhood Cardiometabolic Outcomes of Maternal Obesity During Pregnancy. Novelty and Significance: The Generation R Study," *Hypertension*, vol. 63, no. 4, pp. 683–691, Apr. 2014.
- 34  
35 [36] G. C. Sharp *et al.*, "Maternal pre-pregnancy BMI and gestational weight gain, offspring DNA methylation and later offspring adiposity: findings from the Avon Longitudinal Study of Parents and Children," *Int. J. Epidemiol.*, vol. 44, no. 4, pp. 1288–1304, Aug. 2015.
- 36  
37 [37] T. Vaivada, M. F. Gaffey, J. K. Das, and Z. A. Bhutta, "Evidence-based interventions for improvement of maternal and child nutrition in low-income settings: what's new?," *Curr. Opin. Clin. Nutr. Metab. Care*, vol. 20, no. 3, pp. 204–210, May 2017.
- 38  
39 [38] M. Ferguson, K. O'Dea, M. Chatfield, M. Moodie, J. Altman, and J. Brimblecombe, "The comparative cost of food and beverages at remote Indigenous communities, Northern Territory, Australia," *Aust. N. Z. J. Public Health*, vol. 40, no. S1, pp. S21–S26, Apr. 2016.
- 40  
41  
42  
43  
44  
45  
46  
47  
48  
49  
50  
51  
52  
53  
54  
55  
56  
57  
58  
59  
60

- 1  
2  
3 [39] P. Pholeros, T. Lea, S. Rainow, T. Sowerbutts, and P. J. Torzillo, "Improving the state of health  
4 hardware in Australian Indigenous housing: building more houses is not the only answer," *Int. J.*  
5 *Circumpolar Health*, vol. 72, no. 1, p. 21181, Jan. 2013.  
6 [40] J. Brimblecombe, M. Ferguson, F. Barzi, C. Brown, and K. Ball, "Mediators and moderators of nutrition  
7 intervention effects in remote Indigenous Australia," *Br. J. Nutr.*, vol. 119, no. 12, pp. 1424–1433, Jun.  
8 2018.  
9 [41] L. Schembri *et al.*, "The effect of nutrition education on nutrition-related health outcomes of  
10 Aboriginal and Torres Strait Islander people: a systematic review," *Aust. N. Z. J. Public Health*, vol. 40,  
11 no. S1, pp. S42–S47, Apr. 2016.  
12 [42] J. Brimblecombe *et al.*, "Feasibility of a novel participatory multi-sector continuous improvement  
13 approach to enhance food security in remote Indigenous Australian communities," *SSM - Popul.*  
14 *Health*, vol. 3, pp. 566–576, Dec. 2017.  
15  
16  
17  
18  
19  
20  
21  
22  
23  
24  
25  
26  
27  
28  
29  
30  
31  
32  
33  
34  
35  
36  
37  
38  
39  
40  
41  
42  
43  
44  
45  
46  
47  
48  
49  
50  
51  
52  
53  
54  
55  
56  
57  
58  
59  
60

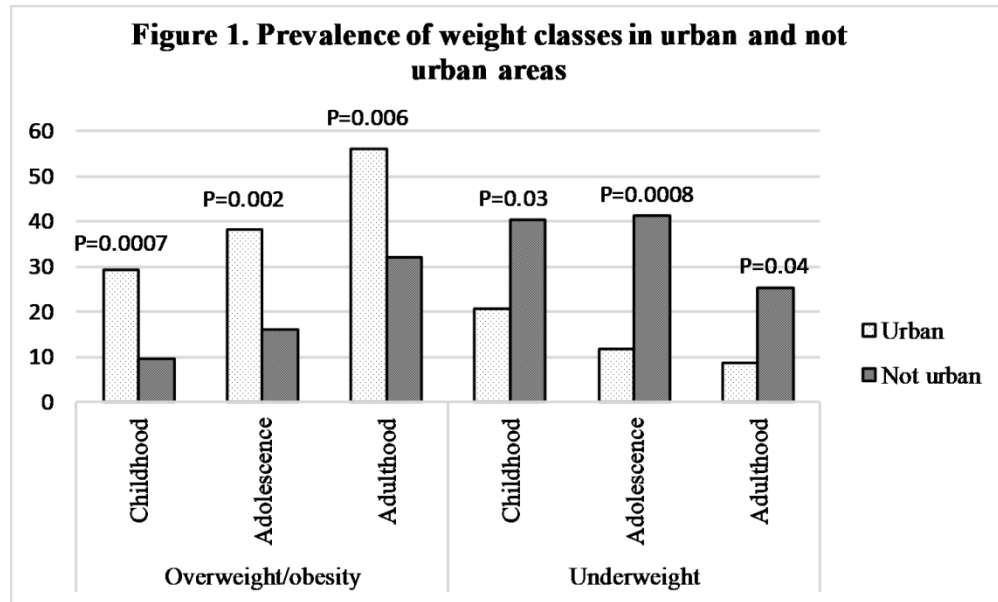

Figure 1. Percentages of underweight and overweight/obese participants by sex. For classification, age and sex specific cut-off points were used for participants under 18 years of age at follow-up. For participants aged 18 and over, underweight was classified as BMI < 18,5; normal weight as 18,5-24,99; overweight as 25-29,99 and obesity as  $\geq 30$ .

127x76mm (300 x 300 DPI)



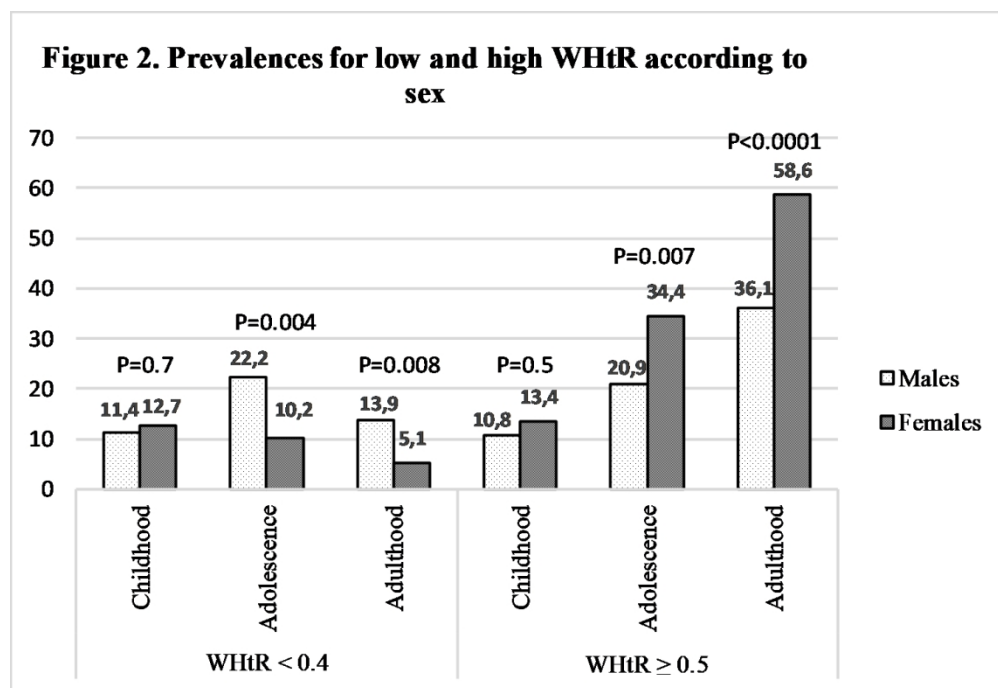

Figure 2. Prevalences for low and high waist-to-height ratio at three time points according to sex. P-values are calculated with chi-square tests and represent differences between sexes. Values are in percentages.

127x86mm (300 x 300 DPI)

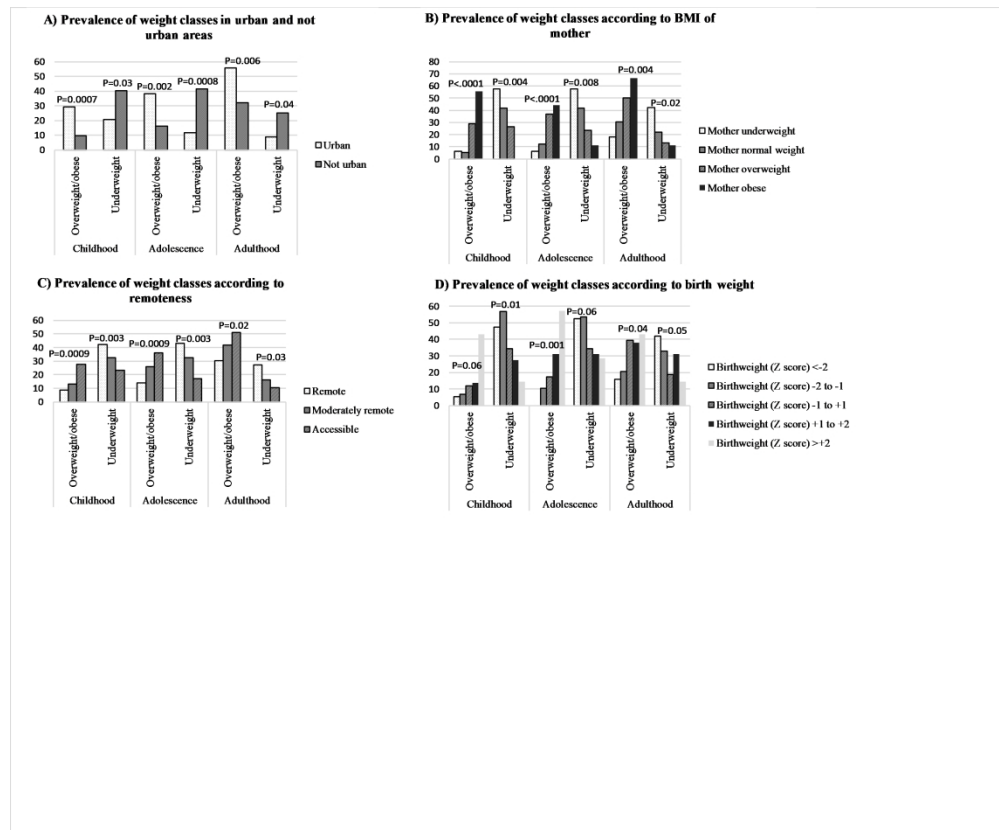

Figure 3. Prevalences of overweight/obesity and underweight in participants according to urban residence (A), maternal BMI (B), areal disadvantage (C), and birth weight (D). Chi-square tests were used to assess association between weight status and presented categories.

294x242mm (300 x 300 DPI)

|                      | Participants<br>(N=315) | Dropouts<br>(N=371) | P-value  |
|----------------------|-------------------------|---------------------|----------|
| Males (%)            | 50.2                    | 53.1                | P=0.44   |
| Urban residence (%)  | 10.8                    | 31.8                | P<0.0001 |
| Birthweight, z score | -0.29                   | -0.30               | P=0.95   |
| IRSEO score          | 80.8                    | 65.9                | P<0.0001 |
| Maternal BMI         | 22.2                    | 22.3                | P=0.71   |

Comparison between participants and dropouts. Values for categorical variables (sex, urban residence) are presented in percentages and values for continuous variables in means. Chi-square tests were used for analysis of categorical variables and t-tests for continuous variables.

STROBE Statement—Checklist of items that should be included in reports of *cohort studies*

|                              | Item No | Recommendation                                                                                                                                                                                                                                                                                                         | Page No |
|------------------------------|---------|------------------------------------------------------------------------------------------------------------------------------------------------------------------------------------------------------------------------------------------------------------------------------------------------------------------------|---------|
| <b>Title and abstract</b>    | 1       | (a) Indicate the study's design with a commonly used term in the title or the abstract<br>(b) Provide in the abstract an informative and balanced summary of what was done and what was found                                                                                                                          | 2<br>2  |
| <b>Introduction</b>          |         |                                                                                                                                                                                                                                                                                                                        |         |
| Background/rationale         | 2       | Explain the scientific background and rationale for the investigation being reported                                                                                                                                                                                                                                   | 4-5     |
| Objectives                   | 3       | State specific objectives, including any prespecified hypotheses                                                                                                                                                                                                                                                       | 5       |
| <b>Methods</b>               |         |                                                                                                                                                                                                                                                                                                                        |         |
| Study design                 | 4       | Present key elements of study design early in the paper                                                                                                                                                                                                                                                                | 5       |
| Setting                      | 5       | Describe the setting, locations, and relevant dates, including periods of recruitment, exposure, follow-up, and data collection                                                                                                                                                                                        | 5       |
| Participants                 | 6       | (a) Give the eligibility criteria, and the sources and methods of selection of participants. Describe methods of follow-up<br>(b) For matched studies, give matching criteria and number of exposed and unexposed                                                                                                      | 5       |
| Variables                    | 7       | Clearly define all outcomes, exposures, predictors, potential confounders, and effect modifiers. Give diagnostic criteria, if applicable                                                                                                                                                                               | 6-7     |
| Data sources/<br>measurement | 8*      | For each variable of interest, give sources of data and details of methods of assessment (measurement). Describe comparability of assessment methods if there is more than one group                                                                                                                                   | 6-7     |
| Bias                         | 9       | Describe any efforts to address potential sources of bias                                                                                                                                                                                                                                                              | 5, 12   |
| Study size                   | 10      | Explain how the study size was arrived at                                                                                                                                                                                                                                                                              | 5       |
| Quantitative variables       | 11      | Explain how quantitative variables were handled in the analyses. If applicable, describe which groupings were chosen and why                                                                                                                                                                                           | 6-7     |
| Statistical methods          | 12      | (a) Describe all statistical methods, including those used to control for confounding<br>(b) Describe any methods used to examine subgroups and interactions<br>(c) Explain how missing data were addressed<br>(d) If applicable, explain how loss to follow-up was addressed<br>(e) Describe any sensitivity analyses | 8       |
| <b>Results</b>               |         |                                                                                                                                                                                                                                                                                                                        |         |
| Participants                 | 13*     | (a) Report numbers of individuals at each stage of study—eg numbers potentially eligible, examined for eligibility, confirmed eligible, included in the study, completing follow-up, and analysed<br>(b) Give reasons for non-participation at each stage<br>(c) Consider use of a flow diagram                        | 5       |
| Descriptive data             | 14*     | (a) Give characteristics of study participants (eg demographic, clinical, social) and information on exposures and potential confounders<br>(b) Indicate number of participants with missing data for each variable of interest<br>(c) Summarise follow-up time (eg, average and total amount)                         | table 1 |
| Outcome data                 | 15*     | Report numbers of outcome events or summary measures over time                                                                                                                                                                                                                                                         | table 1 |

|                                                                                                                                                                                                                |                          |    |                                                                                                                                                                                                                                                                                                                                                                                                               |       |
|----------------------------------------------------------------------------------------------------------------------------------------------------------------------------------------------------------------|--------------------------|----|---------------------------------------------------------------------------------------------------------------------------------------------------------------------------------------------------------------------------------------------------------------------------------------------------------------------------------------------------------------------------------------------------------------|-------|
| 1<br>2<br>3<br>4<br>5<br>6<br>7<br>8                                                                                                                                                                           | Main results             | 16 | (a) Give unadjusted estimates and, if applicable, confounder-adjusted estimates and their precision (eg, 95% confidence interval). Make clear which confounders were adjusted for and why they were included<br>(b) Report category boundaries when continuous variables were categorized<br>(c) If relevant, consider translating estimates of relative risk into absolute risk for a meaningful time period | 8-10  |
| 9<br>10<br>11                                                                                                                                                                                                  | Other analyses           | 17 | Report other analyses done—eg analyses of subgroups and interactions, and sensitivity analyses                                                                                                                                                                                                                                                                                                                |       |
| 12                                                                                                                                                                                                             | <b>Discussion</b>        |    |                                                                                                                                                                                                                                                                                                                                                                                                               |       |
| 13<br>14<br>15<br>16<br>17<br>18<br>19<br>20<br>21                                                                                                                                                             | Key results              | 18 | Summarise key results with reference to study objectives                                                                                                                                                                                                                                                                                                                                                      | 10-11 |
| 22<br>23<br>24<br>25                                                                                                                                                                                           | Limitations              | 19 | Discuss limitations of the study, taking into account sources of potential bias or imprecision. Discuss both direction and magnitude of any potential bias                                                                                                                                                                                                                                                    | 12    |
| 26<br>27<br>28<br>29<br>30<br>31<br>32<br>33<br>34<br>35<br>36<br>37<br>38<br>39<br>40<br>41<br>42<br>43<br>44<br>45<br>46<br>47<br>48<br>49<br>50<br>51<br>52<br>53<br>54<br>55<br>56<br>57<br>58<br>59<br>60 | Interpretation           | 20 | Give a cautious overall interpretation of results considering objectives, limitations, multiplicity of analyses, results from similar studies, and other relevant evidence                                                                                                                                                                                                                                    | 11-12 |
|                                                                                                                                                                                                                | Generalisability         | 21 | Discuss the generalisability (external validity) of the study results                                                                                                                                                                                                                                                                                                                                         | 12    |
|                                                                                                                                                                                                                | <b>Other information</b> |    |                                                                                                                                                                                                                                                                                                                                                                                                               |       |
|                                                                                                                                                                                                                | Funding                  | 22 | Give the source of funding and the role of the funders for the present study and, if applicable, for the original study on which the present article is based                                                                                                                                                                                                                                                 | 1     |

\*Give information separately for exposed and unexposed groups.

**Note:** An Explanation and Elaboration article discusses each checklist item and gives methodological background and published examples of transparent reporting. The STROBE checklist is best used in conjunction with this article (freely available on the Web sites of PLoS Medicine at <http://www.plosmedicine.org/>, Annals of Internal Medicine at <http://www.annals.org/>, and Epidemiology at <http://www.epidem.com/>). Information on the STROBE Initiative is available at <http://www.strobe-statement.org>.

# BMJ Open

## Socioeconomic status, remoteness, and tracking of nutritional status from childhood to adulthood in an Australian Aboriginal Birth Cohort - the ABC study.

|                                 |                                                                                                                                                                                                                                                                                                                                                                                                                                                                                                                                                                                                  |
|---------------------------------|--------------------------------------------------------------------------------------------------------------------------------------------------------------------------------------------------------------------------------------------------------------------------------------------------------------------------------------------------------------------------------------------------------------------------------------------------------------------------------------------------------------------------------------------------------------------------------------------------|
| Journal:                        | <i>BMJ Open</i>                                                                                                                                                                                                                                                                                                                                                                                                                                                                                                                                                                                  |
| Manuscript ID                   | bmjopen-2019-033631.R2                                                                                                                                                                                                                                                                                                                                                                                                                                                                                                                                                                           |
| Article Type:                   | Research                                                                                                                                                                                                                                                                                                                                                                                                                                                                                                                                                                                         |
| Date Submitted by the Author:   | 08-Jan-2020                                                                                                                                                                                                                                                                                                                                                                                                                                                                                                                                                                                      |
| Complete List of Authors:       | Sjöholm, Pauline; University of Turku, Department of Medicine; Vaasa Central Hospital<br>Pahkala, Katja; University of Turku, Research Centre of Applied and Preventive Cardiovascular Medicine; University of Turku, Paavo Nurmi Centre, Sports & Exercise Medicine Unit, Department of Physical Activity and Health<br>Davison, Belinda; Menzies School of Health Research<br>Juonala, Markus; University of Turku, Department of Medicine; Murdoch Childrens Research Institute<br>Singh, Gurmeet; Menzies School of Health Research; Flinders University, Northern Territory Medical Program |
| <b>Primary Subject Heading</b>: | Nutrition and metabolism                                                                                                                                                                                                                                                                                                                                                                                                                                                                                                                                                                         |
| Secondary Subject Heading:      | Epidemiology, Public health                                                                                                                                                                                                                                                                                                                                                                                                                                                                                                                                                                      |
| Keywords:                       | SOCIAL MEDICINE, PUBLIC HEALTH, Community child health < PAEDIATRICS, NUTRITION & DIETETICS, EPIDEMIOLOGY                                                                                                                                                                                                                                                                                                                                                                                                                                                                                        |
|                                 |                                                                                                                                                                                                                                                                                                                                                                                                                                                                                                                                                                                                  |

SCHOLARONE™  
Manuscripts



I, the Submitting Author has the right to grant and does grant on behalf of all authors of the Work (as defined in the below author licence), an exclusive licence and/or a non-exclusive licence for contributions from authors who are: i) UK Crown employees; ii) where BMJ has agreed a CC-BY licence shall apply, and/or iii) in accordance with the terms applicable for US Federal Government officers or employees acting as part of their official duties; on a worldwide, perpetual, irrevocable, royalty-free basis to BMJ Publishing Group Ltd ("BMJ") its licensees and where the relevant Journal is co-owned by BMJ to the co-owners of the Journal, to publish the Work in this journal and any other BMJ products and to exploit all rights, as set out in our [licence](#).

The Submitting Author accepts and understands that any supply made under these terms is made by BMJ to the Submitting Author unless you are acting as an employee on behalf of your employer or a postgraduate student of an affiliated institution which is paying any applicable article publishing charge ("APC") for Open Access articles. Where the Submitting Author wishes to make the Work available on an Open Access basis (and intends to pay the relevant APC), the terms of reuse of such Open Access shall be governed by a Creative Commons licence – details of these licences and which [Creative Commons](#) licence will apply to this Work are set out in our licence referred to above.

Other than as permitted in any relevant BMJ Author's Self Archiving Policies, I confirm this Work has not been accepted for publication elsewhere, is not being considered for publication elsewhere and does not duplicate material already published. I confirm all authors consent to publication of this Work and authorise the granting of this licence.

## Socioeconomic status, remoteness, and tracking of nutritional status from childhood to adulthood in an Australian Aboriginal Birth Cohort – the ABC study.

Pauline Sjöholm, MD<sup>1</sup> Katja Pahkala<sup>2</sup>, Belinda Davison<sup>3</sup>, Markus Juonala<sup>4</sup>, Gurmeet R Singh<sup>3,5</sup>

1 Department of Medicine; University of Turku, Turku, Finland; Vaasa Central Hospital, Vaasa, Finland

This author takes responsibility for all aspects of the reliability and freedom from bias of the data presented and their discussed interpretation.

2 Research Centre of Applied and Preventive Cardiovascular Medicine, University of Turku, Turku, Finland; Paavo Nurmi Centre, Sports & Exercise Medicine Unit, Department of Physical Activity and Health, University of Turku, Turku, Finland

3 Menzies School of Health Research, Charles Darwin University, Darwin, Australia

4 Department of Medicine, University of Turku, Turku, Finland; Division of Medicine, Turku University Hospital, Turku, Finland; Murdoch Childrens Research Institute, Parkville, Victoria, Australia.

5 Northern Territory Medical Program, Flinders University, Darwin, Australia

**Conflicts of interest:** The authors report no relationships that could be construed as a conflict of interest.

**Contributorship statement:** P.S., K.P., B.D., G.S. and M.J. contributed to the analysis and interpretation of data. B.D. and G.S. were responsible for the design and implementation of the larger study of which this paper is a part. B.D. and G.S. collected and managed the data used in this study. P.S. wrote the paper with input from all authors. All authors approved of the final version to be submitted and agree to be accountable for all aspects of the work.

**Funding:** The authors received no specific funding for this paper

**Data sharing statement:** All data are stored confidentially and are not freely available in the public domain, but specific proposals for collaboration are welcomed. Collaborations are established through formal agreement with the ABC steering committee. Contact information: [abcstudy@menzies.edu.au](mailto:abcstudy@menzies.edu.au)

**Ethics statement:** This study was approved by the Human Research Ethics Committee of Northern Territory Department of Health and Menzies School of Health Research, including the Aboriginal Ethical Sub-committee which has the power of veto (ABC Reference no. 2013-2022). All research was performed in accordance with the National Health and Medical Research Council guidelines (National Statement on Ethical Conduct in Human Research, 2008). Informed written consent was obtained from all participants.

**Key words:** Nutritional Status, Indigenous, Socioeconomic

**Reprint request and correspondence:** Pauline Sjöholm, Department of Medicine, University of Turku, Kiinamyllynkatu 10, FIN-20520 Turku, Finland. E-mail [plsjoh@utu.fi](mailto:plsjoh@utu.fi)



1  
2  
3  
4  
5  
6  
7  
8  
9  
10  
11  
12  
13  
14  
15  
16  
17  
18  
19  
20  
21  
22  
23  
24  
25  
26  
27  
28  
29  
30  
31  
32  
33  
34  
35  
36  
37  
38  
39  
40  
41  
42  
43  
44  
45  
46  
47  
48  
49  
50  
51  
52  
53  
54  
55  
56  
57  
58  
59  
60

## ABSTRACT

**Objectives:** To determine prevalences of underweight and overweight as well as low and high waist-to-height ratio (WHtR) in three prospective follow-ups and to explore tracking of these measures of nutritional status from childhood to adolescence and adulthood. The influence of socioeconomic status, remoteness, maternal body mass index (BMI) and birth weight on weight status was assessed.

**Design:** Longitudinal birth cohort study of Indigenous Australians.

**Setting:** Data derived from three follow-ups of the Aboriginal Birth Cohort (ABC) study with mean ages of 11.4, 18.2 and 25.4 years for the participants.

**Participants:** Of the 686 Indigenous babies recruited to the study between 1987-1990, 315 had anthropometric measurements for all three follow-ups and were included in this study.

**Primary and secondary outcome measures:** Categories for BMI (underweight, normal weight, overweight and obesity) and WHtR (low and high), sex, areal socioeconomic disadvantage as defined by the Indigenous Relative Socioeconomic Outcomes index, urban/remote residence, maternal BMI, birth weight. Logistic regression was used to calculate odds ratios for belonging to a certain BMI category in adolescence and adulthood according to BMI category in childhood and adolescence.

**Results:** Underweight was common (38% in childhood and 24% in adulthood) and the prevalence of overweight/obesity increased with age (12% in childhood and 35% in adulthood). Both extremes of weight status as well as low and high WHtR tracked from childhood to adulthood. Underweight was more common and overweight less common in remote and more disadvantaged areas. Birth weight and maternal BMI were associated with later weight status. There were significant sex differences for prevalences and tracking of WHtR but not for BMI.

**Conclusions:** Socioeconomic factors, remoteness and gender must be addressed when assessing nutrition-related issues in the Indigenous communities due to the variation in nutritional status and its behaviour over time within the Indigenous population.

## ARTICLE SUMMARY

### Strengths and limitations of this study

- This cohort is the longest-running and largest Indigenous birth cohort in Australasia and presents unique data about the health of the contemporary Indigenous population.
- Despite logistic challenges relating to geography and accessibility, the retention rates were good.
- The present study offers novel findings about the geographical, socioeconomic and gender differences in nutritional status that should be addressed when developing new strategies to reduce the immense health inequalities in Australia.
- The study population was relatively small with a substantial amount of missing data.
- At this young age, the participants are healthy with very few showing overt disease, thus analysis of morbidity was not done. This will be addressed in future follow-ups.

1  
2  
3  
4  
5  
6  
7  
8  
9  
10  
11  
12  
13  
14  
15  
16  
17  
18  
19  
20  
21  
22  
23  
24  
25  
26  
27  
28  
29  
30  
31  
32  
33  
34  
35  
36  
37  
38  
39  
40  
41  
42  
43  
44  
45  
46  
47  
48  
49  
50  
51  
52  
53  
54  
55  
56  
57  
58  
59  
60

## INTRODUCTION

The dual burden of malnutrition defined as the coexistence of obesity and underweight within individuals, households or populations is a phenomenon commonly seen in low and middle-income countries but less so in high-income countries.[1]

The Indigenous (used respectfully to include both Aboriginal and Torres Strait Islander peoples) population in Australia has experienced a dramatic nutritional transition since European colonisation.[2] Indigenous Australians, especially those living in remote regions, are prone to a number of morbidities associated with non-favourable nutrition throughout life.[3] In 2012-2013, Indigenous Australians were 1.5 times as likely to be affected by obesity as non-Indigenous Australians, with 30% of Indigenous children aged 2-14 years and 66% of persons aged 15 and over being affected by overweight or obesity.[4] However, underweight was almost twice as common in childhood: 8% of Indigenous children were underweight compared with 4.8% of non-Indigenous children.[5] Obesity is a well documented risk factor for cardiovascular disease, type 2 diabetes, cancer and several other non-communicable diseases [6-7] while underweight, a possible manifestation of malnutrition and nutritional deficiencies,[8] is also associated with raised infection risk[9] and pregnancy complications.[10] Both extremes of body composition are associated with substantial medical costs for the communities involved.[11] Overweight and obesity tend to ‘track’ from childhood to adulthood, i.e. remain relatively stable throughout an individual’s lifecourse, according to studies conducted in non-Indigenous populations.[12] Tracking of underweight is a topic less studied, but has been reported in some cohorts.[13] There is a paucity of data in Indigenous children and adolescents regarding tracking of nutritional status.

1  
2  
3 In high-income countries, low socioeconomic status has been shown to be associated with  
4  
5 obesity.[14] However, in low and middle income countries, the association is often reversed, and  
6  
7 persons of higher socioeconomic status are more likely to be affected by obesity.[15] The effects of  
8  
9 socioeconomic factors and remoteness on nutritional status have generally been similar for the  
10  
11 Indigenous and the non-Indigenous Australians with obesity being concentrated in urban and less  
12  
13 disadvantaged areas. [4, 16] To our knowledge, there have been no studies examining the  
14  
15 longitudinal development of nutritional status and its associations with socioeconomic factors in  
16  
17 very remote regions of Australia, where food insecurity is high [17] and malnutrition and  
18  
19 underweight are more common [18].  
20  
21  
22  
23

24 The Aboriginal Birth Cohort (ABC) was formed to better understand the reasons behind the high  
25  
26 burden of disease of the Australian Indigenous population and identify possibilities for early  
27  
28 prevention. To date, the study is one of the longest running and largest Indigenous birth cohorts in  
29  
30 Australasia. The intention of this paper is 1) to explore tracking of nutritional status from childhood  
31  
32 to adulthood and 2) to explore the association of socioeconomic status and remoteness at birth with  
33  
34 later nutritional status in the cohort.  
35  
36  
37  
38  
39  
40  
41

## 42 **METHODS**

### 43 **Participants**

44  
45  
46  
47  
48 Details of the recruitment and follow-up of the ABC have been previously published in detail.[19-  
49  
50 20] In brief, between 1987 and 1990, 686 of the eligible 1238 babies born to Indigenous mothers at  
51  
52 the Royal Darwin Hospital were recruited into the study. There were no differences for mean birth  
53  
54 weights or sex ratios between those recruited and those not recruited. Since recruitment (Wave-1),  
55  
56 three follow-ups have been conducted: in childhood (Wave-2) at a mean age of 11.4 years (n=572;  
57  
58 86 % of living participants), in adolescence (Wave-3) at a mean age of 18.2 years (n=469; 71 % of  
59  
60

1  
2  
3 living participants) and most recently in early adulthood (Wave-4) at a mean age of 25.4 years  
4  
5 (n=459; 71 % of living participants).  
6  
7

8 All procedures contributing to this work comply with the Helsinki Declaration of 1975, as revised  
9  
10 in 2008. All participants provided written informed consent to participate in this study, and all  
11  
12 procedures were approved by the Human Research Ethics Committee of the Northern Territory  
13  
14 Department of Health and the Menzies School of Health Research, including the Aboriginal Ethical  
15  
16 Sub-committee which has the power of veto.  
17  
18  
19  
20  
21  
22

### 23 **Patient and public involvement**

24  
25  
26 The study has clear commitment to engaging with Indigenous communities and building Indigenous  
27  
28 capacity. Indigenous researchers have been involved in all aspects of the study at each of the  
29  
30 follow-ups including investigators, data collection team and local community members employed as  
31  
32 research assistants, encouraging and facilitating formal research training. Extensive consultation  
33  
34 with expert, Indigenous and cohort reference groups was conducted prior to each follow-up to  
35  
36 obtain advice and guidance on contact methods, acceptability of planned procedures and methods of  
37  
38 feedback to individuals and communities. Due to the difficulty in providing individual feedback  
39  
40 after the initial visit, feedback is aimed at the community level in remote areas. Updates are  
41  
42 published in community newsletters and in the national Aboriginal and Islander Health Worker  
43  
44 Journal and provided to local community groups, stakeholders and governance groups.  
45  
46  
47  
48  
49  
50  
51

### 52 **Anthropometric measurements**

53  
54  
55 At birth, maternal height and weight was recorded and used to calculate body mass index (BMI;  
56  
57 kg/m<sup>2</sup>) which was classified as underweight (< 18.5), normal weight (18.5-24.99), overweight (25-  
58  
59 29.99) or obese ( $\geq$  30). Birthweight of the participants was transformed into Z-scores and put into 5  
60

1  
2  
3 categories based on the WHO child growth charts [21] 1) low:  $<-2$ ; 2) low-normal:  $-2$  to  $-1$ ; 3)  
4  
5 normal:  $-1$  to  $1$ ; 4) normal-high:  $1$  to  $2$ ; and 5) high  $>2$ .  
6  
7

8  
9 At each follow-up of the study, a small group (3-4) of trained researchers measured height and  
10  
11 weight using standardized methods. Weight was measured in light clothing while barefoot to the  
12  
13 last complete 0.1 kg with a digital scale (TBF-521; Tanita Corporation, Arlington Heights, Illinois,  
14  
15 USA). Height was measured with a portable stadiometer to the nearest millimeter. BMI was  
16  
17 calculated as weight (kg) divided by height (m) squared. Waist circumference was measured to the  
18  
19 nearest millimeter using a flexible tape measure at the midpoint between the lowest rib and iliac  
20  
21 crest at the end of exhalation.  
22  
23

24  
25 Participants were categorised in classes of nutritional status using two alternative classifications:  
26  
27 Body mass index (BMI), a widely used estimate for defining weight status and waist-to-height ratio  
28  
29 (WHtR), an alternative anthropometric measure to define adiposity.  
30  
31

32  
33 For participants who had attained 18 years at follow-up, the following BMI categories were used:  
34  
35 underweight  $<18.5$ , normal weight  $18.5-24.99$ , overweight  $25-29.99$ , obese  $\geq 30$ . For participants  
36  
37 who were under 18 years of age at time of follow-up, age and sex specific cut-off points were used  
38  
39 for categories of weight status (underweight, normal weight, overweight and obese) as defined by  
40  
41 the International Obesity Task Force.[22-23]  
42  
43

44  
45 WHtR has been suggested as a tool for better identifying abdominal obesity and delineating risk for  
46  
47 cardiovascular disease and type 2 diabetes.[24] A cut-off value of 0.5 for WHtR has been  
48  
49 commonly used for screening for cardio-metabolic risk irrespective of age, gender and  
50  
51 ethnicity.[25–27] There is no consensus on a lower normal limit for WHtR, but a value of less than  
52  
53 0.4 has also been previously used. WHtR was calculated as waist circumference in centimeters  
54  
55 divided by height in centimeters and categorised as low ( $<0.4$ ), normal ( $0.4-0.49$ ) or high  
56  
57 ( $\geq 0.5$ ).[28]  
58  
59  
60

1  
2  
3  
4  
5  
6  
7  
8  
9  
10  
11  
12  
13  
14  
15  
16  
17  
18  
19  
20  
21  
22  
23  
24  
25  
26  
27  
28  
29  
30  
31  
32  
33  
34  
35  
36  
37  
38  
39  
40  
41  
42  
43  
44  
45  
46  
47  
48  
49  
50  
51  
52  
53  
54  
55  
56  
57  
58  
59  
60

## Remoteness and childhood socioeconomic situation

For areal socioeconomic disadvantage, the Indigenous Relative Socioeconomic Outcomes (IRSEO) index was used. The IRSEO is calculated at the Indigenous Area level and is based on 9 variables, 3 related to employment, 3 to education, 2 to housing and 1 to income, using information from the 2011 Census of Population and Housing. Each area is assigned to one of 100 percentiles, 1 for the most advantaged and 100 for the most disadvantaged. [29] Based on their reported addresses at birth, the participants were assigned an IRSEO score. The scores were categorised into three groups: low disadvantage (1 to 40), mid-high disadvantage (range 41 to 90), and high disadvantage (range 91 to 100).

Area of residence was classified at birth, with families residing in a rural community with an Aboriginal council classified as “remote” and all “non-remote” locations were classified as “urban”. At Wave-4, 18 % of participants reported to have lived in another community at some point in their lives. However, limited movement between urban and remote settings was seen, with 8.7 % of participants who had lived in a remote community at birth moving to an urban community by Wave-4 and 19 % of the participants who had lived in an urban community at Wave-2 moving to a remote location at by Wave-4.

## Statistical analyses

Participants who were pregnant at Wave-3 and/or Wave-4 were excluded from the analyses. Only participants who had height, weight and waist circumference recorded at all follow-ups were included (N=315). Overweight and obesity were combined into one category due to small numbers. Attrition analyses were performed to compare baseline characteristics between participants included and not included at each follow-up with t-tests for continuous and chi-square tests for categorical

1  
2  
3 variables. Chi-square tests were used to assess the association of weight status and categories of  
4  
5 remoteness, socioeconomic status, maternal BMI and birth weight at all follow-ups separately.  
6  
7

8 Tracking of nutritional status (underweight, overweight/obese and WHtR, low and high) was  
9  
10 analysed using logistic regression and reported as odds ratio (OR) of status being constant across  
11  
12 time: status in childhood continuing into adolescence and adulthood and status in adolescence  
13  
14 continuing into adulthood. Regression analyses were adjusted for age at follow-up, sex and time  
15  
16 between compared follow-ups as well as IRSEO category that was used as a proxy for  
17  
18 socioeconomic status.  
19  
20  
21

22  
23 To assess the changes over time, Cochran's Q tests and McNemar's tests were used to analyse the  
24  
25 differences in the proportions of nutritional status categories by sex over the course of the three  
26  
27 follow-ups.  
28  
29

30 Statistical tests were performed with SAS version 9.4 (SAS Institute, Inc, Cary, NC). Statistical  
31  
32 significance was inferred at a 2-tailed P-value < 0.05.  
33  
34  
35  
36  
37

## 38 **Results**

39  
40 Complete data (height, weight and waist circumference) at all follow-ups were available on 315  
41  
42 participants. There were no significant differences in sex, birth weight and maternal BMI in  
43  
44 participants included and those not included. There were significant differences between the two  
45  
46 groups regarding remoteness and areal disadvantage: those included were more often from remote  
47  
48 and more disadvantaged areas according to IRSEO scores (see supplementary table 1). There were  
49  
50 no significant differences between the BMI or the WHtR values at any follow-up between  
51  
52 participants included and those not included (for BMI: P=0.48 for wave-2 and 3, P=0.47 for wave-  
53  
54 4; for WHtR P=0.5, 0.46 and 0.52 respectively). Descriptive statistics of the participants are  
55  
56 presented in table 1.  
57  
58  
59  
60



*Anthropometric characteristics of participants*

|                                | Childhood (Wave-2) |              | Adolescence (Wave-3) |             | Adulthood (Wave-4) |             |
|--------------------------------|--------------------|--------------|----------------------|-------------|--------------------|-------------|
|                                | Male               | Female       | Male                 | Female      | Male               | Female      |
| <b>Age, years ± SD</b>         | 11.1 ± 1.1         | 10.8 ± 1.1   | 17.9 ± 1.1           | 17.7 ± 1.1  | 25.4 ± 1.1         | 25.2 ± 1.2  |
| <b>Weight, kg</b>              | 34.3 ± 11.5        | 35.2 ± 11.5  | 64.1 ± 20.2          | 53.7 ± 13.0 | 71.1 ± 21.2        | 60.6 ± 16.0 |
| <b>Height, cm</b>              | 143.1 ± 10.1       | 143.0 ± 10.5 | 173.3 ± 6.9          | 161.3 ± 5.2 | 174.3 ± 7.0        | 161.4 ± 5.6 |
| <b>BMI</b>                     | 16.4 ± 3.5         | 16.8 ± 3.4   | 21.2 ± 5.6           | 20.7 ± 4.9  | 23.3 ± 6.0         | 23.3 ± 6.2  |
| <b>Waist circumference, cm</b> | 63.8 ± 9.5         | 63.9 ± 9.0   | 78.8 ± 14.5          | 77.7 ± 12.6 | 85.7 ± 16.0        | 86.2 ± 15.1 |
| <b>WHtR</b>                    | 0.45 ± 0.05        | 0.45 ± 0.05  | 0.45 ± 0.08          | 0.48 ± 0.08 | 0.49 ± 0.09        | 0.54 ± 0.1  |

*Birth characteristics of participants*

|                                   | Male        | Female      | Total               |
|-----------------------------------|-------------|-------------|---------------------|
| <b>N</b>                          | 158 (50.2%) | 157 (40.8%) | 315                 |
| <b>Urban residence, %</b>         | 13.3        | 8.3         | 10.8 (N=315)        |
| <b>Birth weight, Z score ± SD</b> | -0.16 ± 1.2 | -0.42 ± 1.1 | -0.29 ± 1.1 (N=293) |
| <b>IRSEO score</b>                | 78.6 ± 23.9 | 83.0 ± 19.7 | 80.8 ± 22.0 (N=315) |
| <b>BMI of mother</b>              | 22.0 ± 3.8  | 22.6 ± 4.4  | 22.3 ± 4.1 (N=236)  |

**Table 1.** Descriptive characteristics. Mean values with standard deviations for anthropometric measurements of participants in three follow-ups and baseline characteristics.

High rates of underweight were seen at all 3 follow-ups: 38.1 % at Wave-2, 38.1 % at Wave-3 and 23.5 % at Wave-4. Overweight and obesity increased over time: for overweight, 8.9 % at Wave-2, 12.1% at Wave-3 and 22.9 % at Wave-4, and for obesity, 2.9 %, 6.4 % and 11.8 % respectively.

Prevalences of BMI categories according to sex are presented in figure 1. There were no significant differences between the sexes in the prevalence of underweight, overweight or obesity.

The differences in weight status over the course of the three follow-ups were significant with rates of underweight decreasing and rates of overweight/obesity rising ( $P < 0.0001$  for underweight and overweight/obesity for both sexes). There was no statistically significant difference in the rate of underweight between Wave-2 and Wave-3 ( $P = 0.56$  for males and  $P = 0.76$  for females) but a significant difference in the prevalence of underweight between Wave-2 and Wave-4 ( $P < 0.0001$  for both sexes) as well as between Wave-3 and Wave-4 ( $P < 0.0001$  for both sexes). For the prevalences of overweight/obesity, there was a statistically significant difference between Wave-2 and Wave-3 for male participants but not for females ( $P = 0.002$  for males and  $P = 0.16$  for females). Between

1  
2  
3 Wave-2 and Wave-4 the difference was statistically significant for both sexes ( $P<0.0001$ ) as well as  
4  
5 between Wave-3 and Wave-4 ( $P=0.0007$  for males and  $P<0.0001$  for females).  
6  
7

8 Prevalences of low ( $<0.4$ ) and high ( $\geq 0.5$ ) WHtR in the three follow-ups are presented in figure 2.

9  
10 There were no differences between the sexes at Wave-2. In later follow-ups, male participants more  
11  
12 often had a low WHtR (22.2 vs. 10.2 % at Wave-3 [ $P=0.004$ ] and 13.9 vs. 5.1 % at Wave-4  
13  
14 [ $P=0.008$ ]) while female participants more often had a high WHtR (34.4 vs. 20.9 % at Wave-3  
15  
16 [ $P=0.007$ ] and 58.6 vs. 36.1 % at Wave-4 [ $P<0.0001$ ]). The changes in WHtR over the course of the  
17  
18 three follow-ups were significant with rates of low WHtR decreasing and rates of high WHtR rising  
19  
20 ( $P=0.002$  for males and  $P=0.03$  for females for low WHtR and  $P<0.0001$  for both sexes for high  
21  
22 WHtR). Between Wave-2 and Wave-3, there was a statistically significant difference between the  
23  
24 rates for low WHtR for males ( $P=0.003$ ) but not for females ( $P=0.4$ ). Between Wave-2 and Wave-4  
25  
26 the difference was significant for females ( $P=0.01$ ) but not for males ( $P=0.4$ ). For high WHtR, the  
27  
28 difference was significant between Wave-2 and Wave-3 ( $P=0.002$  for males and  $P<0.0001$  for  
29  
30 females) and between Wave-2 and Wave-4 ( $P<0.0001$  for both sexes).  
31  
32  
33  
34  
35

36 The associations between weight class and remoteness, maternal BMI, areal disadvantage (IRSEO)  
37  
38 and birth weight are presented in figure 3. Urban participants were significantly more likely to be  
39  
40 overweight/obese and less likely to be underweight than remote participants in all follow-ups. Areal  
41  
42 socioeconomic disadvantage was significantly associated with weight class in all follow-ups:  
43  
44 participants from more disadvantaged areas were more often underweight and less often  
45  
46 overweight/obese than participants from less disadvantaged areas. Maternal weight status was  
47  
48 significantly associated with offspring weight status in all follow-ups with children of underweight  
49  
50 mothers being more often underweight and children of overweight and obese mothers more often  
51  
52 presenting with overweight and obesity. Birth weight was also associated with later weight status:  
53  
54 smaller babies were more often underweight and less often overweight or obese in all follow-ups.  
55  
56  
57  
58  
59  
60

1  
2  
3  
4  
5  
6  
7  
8  
9  
10  
11  
12  
13  
14  
15  
16  
17  
18  
19  
20  
21  
22  
23  
24  
25  
26  
27  
28  
29  
30  
31  
32  
33  
34  
35  
36  
37  
38  
39  
40  
41  
42  
43  
44  
45  
46  
47  
48  
49  
50  
51  
52  
53  
54  
55  
56  
57  
58  
59  
60

The association was significant in all follow-ups except for overweight status at Wave-2 ( $P=0.06$ ) and underweight status at Wave-3 ( $P=0.06$ ).

Analyses of tracking of weight status according to BMI categories are presented in table 2. Tracking was significant between age groups for all BMI categories, with sex not a significant confounder in any of the analyses. Of the participants who were overweight/obese at Wave-2, 67.6% remained in the same weight status category at Wave-3 (OR 12.9,  $P < 0.0001$ ) and 83.8% at Wave-4 (OR 10.9,  $P < 0.0001$ ). Of the participants who were overweight/obese at Wave-3, 86.2% continued to be overweight/obese at Wave-4 (OR 21.3,  $P < 0.0001$ ). Conversely, of the participants who were overweight/obese at Wave-4, only 28.4% had been overweight/obese already at Wave-2 and 45.9% at Wave-3. Underweight status also showed significant tracking throughout the follow-ups. Of the participants who were underweight at Wave-2, 76.7% were underweight at Wave-3 (OR 22.6,  $P < 0.0001$ ) and 46.7% remained underweight at Wave-4 (OR 9.8,  $P < 0.0001$ ). Of underweight participants at Wave-3, 83.8% were underweight at Wave-4 (OR 17.3,  $P < 0.0001$ ).

There was significant tracking of both low and high WHtR in all follow-ups. Sex was a significant confounder in most analyses (table 3) with tracking of low WHtR being more likely for male participants and tracking of high WHtR more likely for female participants. Of the participants who had a low WHtR at Wave-2, 44.7% remained in the same category at Wave-3 (OR 8.5,  $P < 0.0001$ ) and 23.7% at Wave-4 (OR 4.7,  $P=0.003$ ) while 45.1% of participants with a low WHtR at Wave-3 had a low WHtR at Wave-4 (OR 21.3,  $P < 0.0001$ ). Of the participants with a high WHtR at Wave-2, 71.1% had a high WHtR at Wave-3 (OR 8.3,  $P < 0.0001$ ) and 94.7% at Wave-4 (OR 25.0,  $P < 0.0001$ ). Of the participants with a high WHtR at Wave-3, 85.1% remained in the same category at Wave-4 (OR 10.3,  $P < 0.0001$ ). Of the participants who had a high WHtR in adulthood, 24.2% had a high WHtR already in childhood and 49.7% in adolescence.

## Sensitivity analyses

To test for bias due to the large amount of dropouts, sensitivity analyses were performed for tracking analyses for all plausible values for the whole cohort. Logistic regression analyses adjusted for sex, age at follow-up and time between follow-ups determined that tracking of overweight/obesity was significant from Wave-2 to Wave-3 ( $P<0.0001$ , OR=17.3) and Wave-4 ( $P<0.0001$ , OR=16.1) as well as from Wave-3 to Wave-4 ( $P<0.0001$ , OR=18.7). Tracking was also significant for underweight from Wave-2 to Wave-3 ( $P<0.0001$ , OR=15.8) and to Wave-4 ( $P=0.003$ , OR=4.1) and from Wave-3 to Wave-4 ( $P<0.0001$ , OR=11.2). High WHtR tracked from Wave-2 to Wave-3 ( $P<0.0001$ , OR=9.9) and to Wave-4 ( $P<0.0001$ , OR=21.8) and from Wave-3 to Wave-4 ( $P<0.0001$ , OR=7.9). Low WHtR tracked from Wave-2 to Wave-3 ( $P=0.002$ , OR=2.6) and to Wave-4 ( $P=0.005$ , OR=2.4) and from Wave-3 to Wave-4 ( $P<0.0001$ , OR=7.8).

1  
2 **Table 2.** Associations between weight classes at different timepoints  
3

|                      |                  | Adolescence (Wave-3) |                  |          |                  |                 |          | Adulthood (Wave-4) |                 |          |                  |                  |          |
|----------------------|------------------|----------------------|------------------|----------|------------------|-----------------|----------|--------------------|-----------------|----------|------------------|------------------|----------|
|                      |                  | Underweight          |                  |          | Overweight/obese |                 |          | Underweight        |                 |          | Overweight/obese |                  |          |
|                      |                  | %                    | OR (CI)          | P-value  | %                | OR(CI)          | P-value  | %                  | OR (CI)         | P-value  | %                | OR (CI)          | P-value  |
| Childhood (Wave-2)   | Underweight      | 76.7%                | 20.5 (10.9-38.7) | <0.0001† | 0%               | -               | -        | 46.7%              | 8.8 (4.6-17.0)  | <0.0001† | 8.3%             | 0.09 (0.04-0.2)  | <0.0001  |
|                      | Normal weight    | 17.7%                | 0.15 (0.09-0.3)  | <0.0001† | 20.9%            | 1.3 (0.7-2.5)   | 0.36†    | 10.8%              | 0.2 (0.1-0.4)   | <0.0001† | 43.0%            | 2.1 (1.3-3.5)    | 0.004†   |
|                      | Overweight/obese | 0%                   | -                | -        | 67.6%            | 12.9 (5.7-29.4) | <0.0001† | 2.7%               | 0.09 (0.01-0.7) | 0.0095†  | 83.8%            | 10.9 (4.3-27.8)  | <0.0001† |
| Adolescence (Wave-3) | Underweight      | -                    | -                | -        | -                | -               | -        | 83.8%              | 15.9 (7.6-32.9) | <0.0001  | 3.3%             | 0.03 (0.01-0.08) | <0.0001  |
|                      | Normal weight    | -                    | -                | -        | -                | -               | -        | 16.2%              | 0.2 (0.09-0.3)  | <0.0001† | 40.2%            | 1.4 (0.9-2.4)    | 0.06     |
|                      | Overweight/obese | -                    | -                | -        | -                | -               | -        | 0%                 | -               | -        | 86.2%            | 21.3 (9.1-49.9)  | <0.0001  |

19  
20 Tracking of weight classes from childhood and adolescence to adolescence and adulthood, eg. of the children who were underweight at first follow-up, 76.7% remained underweight in adolescence and 46.7% in adulthood.  
21 Weight classes for participants < 18 years of age based on age and sex specific BMI cut-off points according to Cole et al. (2000, 2007). For adults: underweight BMI < 18.5; normal weight BMI 18.5-24.99; overweight/obese BMI ≥ 22.5. OR adjusted for age (years) at earlier follow-up, time (years) between follow-ups and sex. % indicates percent of participants in weight class at later follow-up. † indicates that IRSEO category was a significant confounder.  
22  
23  
24  
25  
26  
27  
28  
29  
30  
31  
32  
33  
34  
35  
36  
37  
38  
39  
40  
41  
42  
43  
44  
45  
46

**Table 3.** Associations between low and high WHtR at different time points

|                      | Adolescence (Wave-3) |         |                |            |                 |            |        |                  |            |                 | Adulthood (Wave-4) |         |                 |            |                 |            |        |                  |            |                 |          |
|----------------------|----------------------|---------|----------------|------------|-----------------|------------|--------|------------------|------------|-----------------|--------------------|---------|-----------------|------------|-----------------|------------|--------|------------------|------------|-----------------|----------|
|                      | WHtR < 0.4           |         |                |            |                 | WHtR ≥ 0.5 |        |                  |            |                 | WHtR < 0.4         |         |                 |            |                 | WHtR ≥ 0.5 |        |                  |            |                 |          |
|                      | %                    | OR (CI) | P-value        | OR for sex | P-value for sex | %          | OR(CI) | P-value          | OR for sex | P-value for sex | %                  | OR (CI) | P-value         | OR for sex | P-value for sex | %          | OR(CI) | P-value          | OR for sex | P-value for sex |          |
| Childhood (Wave-2)   | WHtR < 0.4           | 44.7    | 8.5 (3.6-20.2) | <0.0001    | 3.7 (1.8-7.7)   | 0.0005†    | 2.6    | 0.05 (0.006-0.3) | 0.003      | 0.4 (0.2-0.7)   | 0.0009†            | 23.7    | 4.7 (1.8-12.5)  | 0.002      | 4.2 (1.7-10.4)  | 0.002†     | 21.1   | 0.2 (0.09-0.5)   | 0.0003     | 0.3 (0.2-0.5)   | <0.0001  |
|                      | WHtR ≥ 0.5           | 0.0     | -              | -          | -               | -          | 71.1   | 8.3 (3.8-18.3)   | <0.0001    | 0.5 (0.2-0.7)   | 0.003              | 0.0     | -               | -          | -               | -          | 94.7   | 25.0 (5.8-108.1) | <0.0001    | 0.3 (0.2-0.6)   | <0.0001† |
| Adolescence (Wave-4) | WHtR < 0.4           | -       | -              | -          | -               | -          | -      | -                | -          | -               | -                  | 45.1    | 21.3 (8.0-56.7) | <0.0001    | 2.0 (0.7-5.4)   | 0.2        | 9.8    | 0.1 (0.04-0.3)   | <0.0001    | 0.5 (0.2-0.7)   | 0.0004   |
|                      | WHtR ≥ 0.5           | -       | -              | -          | -               | -          | -      | -                | -          | -               | -                  | 0.0     | -               | -          | -               | -          | 85.1   | 10.3 (5.3-20.1)  | <0.0001    | 0.4 (0.2-0.7)   | 0.001    |

Tracking of waist-to-height ratio from childhood and adolescence to adolescence and adulthood. OR adjusted for age (years) at earlier follow-up, time (years) between follow-ups and sex. OR for sex modeled as male vs female. % indicates per cent of participants in WHtR at later follow-up. † indicates that IRSEO category was a significant confounder.

## DISCUSSION

In this Indigenous cohort, underweight was common from childhood through to adolescence and young adulthood. Overweight/obesity was relatively less common but increased across time. This is in contrast to the general Australian Indigenous population, where rates of overweight and obesity are higher. It may reflect the cohort demographics with many people residing in remote and very remote communities.

There is significant tracking of nutritional status from childhood to adulthood among Indigenous Australians in this cohort, both when assessed with BMI or WHtR categories. In contrast to BMI, there were significant differences between the sexes for both tracking and prevalence of WHtR categories with females more often presenting with central adiposity in adolescence and adulthood. This finding is consistent with previous studies that show that Indigenous women in general have greater waist circumference than their non-Indigenous counterparts. [30-31]

We have previously reported that females in this cohort have lower levels of physical activity, which may be a possible contributing factor.[32] Central adiposity is a known risk factor for cardiovascular morbidity which accounts for a substantial part of the disparity in health outcomes between Indigenous and non-Indigenous Australians. Therefore, women seem to be at particular risk for chronic disease due to their body fat composition.[31]

Both areal disadvantage and remote residence were associated with lower prevalence of overweight/obesity and higher rates of underweight. This is in contrast to a study from New South Wales that examined Indigenous people aged 45 and older, where participants from more advantaged and urban surroundings had lower prevalences of obesity and overweight than those from remote and disadvantaged areas [16]. In a previous study from the ABC, a significant association was found between remoteness and areal disadvantage at birth and longitudinal development of BMI measured at the same follow-ups as the present study. [33] It seems that the

1  
2  
3 spatial trend in obesity in this cohort is similar to that traditionally seen in low and middle income  
4 countries, where obesity is more concentrated in cities and wealthier regions and underweight is  
5 more common in remote and rural settings. [1] The dual burden of malnutrition within the  
6 population and the urban-remote differential in nutritional status has been previously described in  
7 the cohort at an average age of 25 years.[34]

8  
9  
10 The association between maternal BMI and offspring BMI is consistent with previous studies  
11 conducted in non-Indigenous cohorts. In the Generation R study, it was found that maternal obesity  
12 is associated with adverse cardiometabolic risk profiles including obesity, higher systolic blood  
13 pressure and adverse lipid levels in the offspring at the age of six years.[35] In the Avon  
14 Longitudinal Study of Parents and Children (ALSPAC), a linear trend between maternal pre-  
15 pregnancy BMI and offspring adiposity levels was found: offspring of underweight mothers had  
16 lower rates and offspring of overweight mothers had higher rates of adiposity at 7.5 and 17.2 years.  
17 DNA methylation was suggested as a mediating factor.[36]

18  
19  
20 From a public health point of view, the present paper presents further evidence that dietary  
21 interventions need more tailored approaches, as there exist large variations within the Indigenous  
22 communities regarding nutritional status and its behaviour over time. Interventions need to be  
23 delivered within critical time windows and the gender perspective is essential: pre-pregnant women  
24 and girls in general should receive special attention.[37] The reasons behind the dual burden of  
25 malnutrition, particularly the high rates of underweight in the remote and more disadvantaged  
26 communities, are multifactorial and include high food prices, low incomes, overcrowded  
27 households and rudimentary cooking facilities [38-39]. Approaches that have been suggested to  
28 improve diet in the remote communities include eliminating socioeconomic constraints by reducing  
29 prices on fruits and vegetables in the community stores and enhancing nutrition-related consumer  
30 education and thus improving food security and self-efficacy to cook. [40] Nutrition education  
31 including cooking skills workshops, group education sessions and store interventions have been  
32  
33  
34  
35  
36  
37  
38  
39  
40  
41  
42  
43  
44  
45  
46  
47  
48  
49  
50  
51  
52  
53  
54  
55  
56  
57  
58  
59  
60



1  
2  
3 reported to have some positive effect on obesity in Indigenous communities according to a review  
4 study that included both remote and urban communities in Australia [41]. Multi-sector participatory  
5 approaches to strengthen food systems in remote Indigenous communities are needed [42] with a  
6 special focus on nutrition in the early life.  
7  
8  
9  
10

11  
12 The strengths of the study include its longitudinal design and well-structured follow-ups with  
13 relatively good retention rates. The study population however is relatively small causing some  
14 limitations to the interpretation of the results and as only participants with data from all follow-ups  
15 were included, the missing data was quite substantial. However, the results from the sensitivity  
16 analyses where all data points were analysed were similar to the analyses presented. There were  
17 significant geographical differences between participants and non-participants, with non-  
18 participants being more often from urban and less disadvantaged areas. This potential bias may  
19 exaggerate the prevalences for underweight in the cohort as underweight was more prevalent in the  
20 remote and disadvantaged regions. The presented associations between weight status and  
21 socioeconomic status, remoteness, maternal BMI and birth weight are merely descriptive analyses  
22 presented separately for each follow-up as the data was not analysed in a longitudinal fashion and  
23 correlation over time was not assessed as this was not the main aim of the article. Other limitations  
24 include the definition of socioeconomic status, as the individual level indicators of socioeconomic  
25 status such as income were not available. IRSEO describes socioeconomic disadvantage on an area  
26 level and may not reflect the individual situation of the participants. Finally, the participants were  
27 still young during the last follow-up. After future follow-ups, cardiovascular morbidity and clinical  
28 events are likely to be more prevalent and could be analysed for even better understanding of the  
29 clinical relevance of the nutritional status and obesity trends in this cohort.  
30  
31  
32  
33  
34  
35  
36  
37  
38  
39  
40  
41  
42  
43  
44  
45  
46  
47  
48  
49  
50  
51  
52  
53

54  
55 In summary, this study presents strong evidence on tracking of nutritional status from childhood to  
56 adulthood in this unique Indigenous cohort. Socioeconomic status and remoteness factors were  
57 associated with weight status in all follow-ups. The differences in central adiposity between males  
58  
59  
60

1  
2  
3 and females that seem to arise after childhood indicate a need for targeted and successfully timed  
4 approaches in dietary interventions. The high prevalence of underweight across all age groups  
5  
6 requires special attention in the process of improving nutritional health overall in the remote  
7  
8  
9  
10 Indigenous communities.  
11  
12  
13  
14  
15  
16  
17  
18  
19  
20  
21  
22  
23  
24  
25  
26  
27  
28  
29  
30  
31  
32  
33  
34  
35  
36  
37  
38  
39  
40  
41  
42  
43  
44  
45  
46  
47  
48  
49  
50  
51  
52  
53  
54  
55  
56  
57  
58  
59  
60

For peer review only

1  
2  
3  
4  
5  
6  
7  
8  
9  
10  
11  
12  
13  
14  
15  
16  
17  
18  
19  
20  
21  
22  
23  
24  
25  
26  
27  
28  
29  
30  
31  
32  
33  
34  
35  
36  
37  
38  
39  
40  
41  
42  
43  
44  
45  
46  
47  
48  
49  
50  
51  
52  
53  
54  
55  
56  
57  
58  
59  
60

## FIGURE LEGENDS

**Figure 1.** Percentages of underweight and overweight/obese participants by sex. For classification, age and sex specific cut-off points were used for participants under 18 years of age at follow-up. For participants aged 18 and over, underweight was classified as BMI < 18,5; normal weight as 18,5-24,99; overweight as 25-29,99 and obesity as  $\geq 30$ .

**Figure 2.** Prevalences for low and high waist-to-height ratio at three time points according to sex. P-values were calculated with chi-square tests and represent differences between sexes. Values are in percentages.

**Figure 3.** Prevalences of overweight/obesity and underweight in participants according to urban residence (A), maternal BMI (B), areal disadvantage (C), and birth weight (D). Chi-square tests were used to assess association between weight status and presented categories.

## References

- [1] B. M. Popkin, L. S. Adair, and S. W. Ng, "Global nutrition transition and the pandemic of obesity in developing countries," *Nutr. Rev.*, vol. 70, no. 1, pp. 3–21, Jan. 2012, doi: 10.1111/j.1753-4887.2011.00456.x.
- [2] M. Ferguson, C. Brown, C. Georga, E. Miles, A. Wilson, and J. Brimblecombe, "Traditional food availability and consumption in remote Aboriginal communities in the Northern Territory, Australia," *Aust. N. Z. J. Public Health*, vol. 41, no. 3, pp. 294–298, Jun. 2017, doi: 10.1111/1753-6405.12664.
- [3] J. K. Brimblecombe, M. M. Ferguson, S. C. Liberato, and K. O'Dea, "Characteristics of the community-level diet of Aboriginal people in remote northern Australia," *Med. J. Aust.*, vol. 198, no. 7, pp. 380–384, Apr. 2013, doi: 10.5694/mja12.11407.
- [4] Australian Bureau of Statistics, "Australian Aboriginal and Torres Strait Islander Health Survey: First Results." ABS, Canberra, 2013.
- [5] AIHW, "The health and welfare of Australia's Aboriginal and Torres Strait Islander peoples: 2015. Cat. no. IHW 147. Canberra: AIHW.,," 2015.
- [6] Expert Panel Members *et al.*, "Executive summary: Guidelines (2013) for the management of overweight and obesity in adults: A Report of the American College of Cardiology/American Heart Association Task Force on Practice Guidelines and The Obesity Society Published by The O," *Obesity*, vol. 22, no. S2, pp. S5–S39, Jul. 2014, doi: 10.1002/oby.20821.
- [7] P. W. Franks, R. L. Hanson, W. C. Knowler, M. L. Sievers, P. H. Bennett, and H. C. Looker, "Childhood Obesity, Other Cardiovascular Risk Factors, and Premature Death," *N. Engl. J. Med.*, vol. 362, no. 6, pp. 485–493, Feb. 2010, doi: 10.1056/NEJMoa0904130.
- [8] W. Cai, "Nutritional challenges for children in societies in transition:," *Curr. Opin. Clin. Nutr. Metab. Care*, vol. 17, no. 3, pp. 278–284, May 2014, doi: 10.1097/MCO.0000000000000042.
- [9] J. Dobner and S. Kaser, "Body mass index and the risk of infection - from underweight to obesity," *Clin. Microbiol. Infect.*, vol. 24, no. 1, pp. 24–28, Jan. 2018, doi: 10.1016/j.cmi.2017.02.013.
- [10] A. Cristina Rossi, "Underweight and pregnancy," *BJOG Int. J. Obstet. Gynaecol.*, vol. 123, no. 12, pp. 2008–2008, Nov. 2016, doi: 10.1111/1471-0528.14129.
- [11] M. E. Hoque, M. Mannan, K. Z. Long, and A. A. Mamun, "Economic burden of underweight and overweight among adults in the Asia-Pacific region: a systematic review," *Trop. Med. Int. Health*, vol. 21, no. 4, pp. 458–469, Apr. 2016, doi: 10.1111/tmi.12679.
- [12] A. S. Singh, C. Mulder, J. W. R. Twisk, W. Van Mechelen, and M. J. M. Chinapaw, "Tracking of childhood overweight into adulthood: a systematic review of the literature: Tracking of childhood overweight into adulthood," *Obes. Rev.*, vol. 9, no. 5, pp. 474–488, Mar. 2008, doi: 10.1111/j.1467-789X.2008.00475.x.
- [13] J. de Wilde, B. Middelkoop, and P. Verkerk, "Tracking of thinness and overweight in children of Dutch, Turkish, Moroccan and South Asian descent from 3 through 15 years of age: a historical cohort study," *Int. J. Obes.*, vol. 42, no. 6, pp. 1230–1238, Jun. 2018, doi: 10.1038/s41366-018-0135-9.
- [14] M. Devaux and F. Sassi, "Social inequalities in obesity and overweight in 11 OECD countries," *Eur. J. Public Health*, vol. 23, no. 3, pp. 464–469, Jun. 2013, doi: 10.1093/eurpub/ckr058.
- [15] G. D. Dinsa, Y. Goryakin, E. Fumagalli, and M. Suhrcke, "Obesity and socioeconomic status in developing countries: a systematic review: Obesity and socio-economic status in developing countries," *Obes. Rev.*, vol. 13, no. 11, pp. 1067–1079, Nov. 2012, doi: 10.1111/j.1467-789X.2012.01017.x.
- [16] K. A. Thurber *et al.*, "Obesity and its association with sociodemographic factors, health behaviours and health status among Aboriginal and non-Aboriginal adults in New South Wales, Australia," *J. Epidemiol. Community Health*, vol. 72, no. 6, pp. 491–498, Jun. 2018, doi: 10.1136/jech-2017-210064.
- [17] Australian Bureau of Statistics, "Australian Aboriginal and Torres Strait Islander Health Survey: Nutrition Results - Food and Nutrients, 2012-13." Canberra: ABS, 2015.

- 1  
2  
3 [18] N. F. Morris, S. Stewart, M. D. Riley, and G. P. Maguire, "The burden and nature of malnutrition  
4 among patients in regional hospital settings: A cross-sectional survey," *Clin. Nutr. ESPEN*, vol. 23, pp.  
5 1–9, Feb. 2018, doi: 10.1016/j.clnesp.2017.12.010.
- 6 [19] S. M. Sayers, D. Mackerras, G. Singh, I. Bucens, K. Flynn, and A. Reid, "An Australian Aboriginal birth  
7 cohort: a unique resource for a life course study of an Indigenous population. A study protocol," *BMC*  
8 *Int. Health Hum. Rights*, vol. 3, no. 1, p. 1, Mar. 2003.
- 9 [20] S. Sayers *et al.*, "Australian Aboriginal Birth Cohort study: follow-up processes at 20 years," *BMC Int.*  
10 *Health Hum. Rights*, vol. 9, p. 23, Sep. 2009, doi: 10.1186/1472-698X-9-23.
- 11 [21] World Health Organization, "WHO child growth standards." .
- 12 [22] T. J. Cole, "Establishing a standard definition for child overweight and obesity worldwide:  
13 international survey," *BMJ*, vol. 320, no. 7244, pp. 1240–1240, May 2000, doi:  
14 10.1136/bmj.320.7244.1240.
- 15 [23] T. J. Cole, K. M. Flegal, D. Nicholls, and A. A. Jackson, "Body mass index cut offs to define thinness in  
16 children and adolescents: international survey," *BMJ*, vol. 335, no. 7612, p. 194, Jul. 2007, doi:  
17 10.1136/bmj.39238.399444.55.
- 18 [24] M. Ashwell, P. Gunn, and S. Gibson, "Waist-to-height ratio is a better screening tool than waist  
19 circumference and BMI for adult cardiometabolic risk factors: systematic review and meta-analysis:  
20 Waist-to-height ratio as a screening tool," *Obes. Rev.*, vol. 13, no. 3, pp. 275–286, Mar. 2012, doi:  
21 10.1111/j.1467-789X.2011.00952.x.
- 22 [25] L. M. Browning, S. D. Hsieh, and M. Ashwell, "A systematic review of waist-to-height ratio as a  
23 screening tool for the prediction of cardiovascular disease and diabetes: 0.5 could be a suitable global  
24 boundary value," *Nutr. Res. Rev.*, vol. 23, no. 02, pp. 247–269, Dec. 2010, doi:  
25 10.1017/S0954422410000144.
- 26 [26] M. Khoury, C. Manhiot, and B. W. McCrindle, "Role of the Waist/Height Ratio in the Cardiometabolic  
27 Risk Assessment of Children Classified by Body Mass Index," *J. Am. Coll. Cardiol.*, vol. 62, no. 8, pp.  
28 742–751, Aug. 2013, doi: 10.1016/j.jacc.2013.01.026.
- 29 [27] V. M. Kuba, C. Leone, and D. Damiani, "Is waist-to-height ratio a useful indicator of cardio-metabolic  
30 risk in 6-10-year-old children?," *BMC Pediatr.*, vol. 13, no. 1, Dec. 2013, doi: 10.1186/1471-2431-13-  
31 91.
- 32 [28] Y. Zhang, Z. Wang, Z. Chu, and J. Zhao, "Profiles of body mass index and the nutritional status among  
33 children and adolescents categorized by waist-to-height ratio cut-offs," *Int. J. Cardiol.*, vol. 223, pp.  
34 529–533, Nov. 2016, doi: 10.1016/j.ijcard.2016.07.303.
- 35 [29] N. Biddle, "CAEPR Indigenous Population Project: 2011 Census Papers. Paper 13. Socioeconomic  
36 outcomes.," Centre for Aboriginal Economic Policy Research, The Australian National University.,  
37 Canberra, 2013.
- 38 [30] L. S. Piers, K. G. Rowley, M. J. Soares, and K. O'Dea, "Relation of adiposity and body fat distribution to  
39 body mass index in Australians of Aboriginal and European ancestry," *Eur. J. Clin. Nutr.*, vol. 57, no. 8,  
40 pp. 956–963, Aug. 2003, doi: 10.1038/sj.ejcn.1601630.
- 41 [31] O. O. Adegbija and Z. Wang, "Gender variations in waist circumference levels between Aboriginal and  
42 non-Aboriginal Australian populations: A systematic review," *Obes. Res. Clin. Pract.*, vol. 8, no. 6, pp.  
43 e513–e524, Nov. 2014, doi: 10.1016/j.orcp.2013.11.009.
- 44 [32] P. Sjöholm, K. Pahkala, B. Davison, M. Juonala, and G. R. Singh, "Early life determinants of  
45 cardiovascular health in adulthood. The Australian Aboriginal Birth Cohort study," *Int. J. Cardiol.*, vol.  
46 269, pp. 304–309, Oct. 2018, doi: 10.1016/j.ijcard.2018.06.035.
- 47 [33] M. Juonala *et al.*, "The Australian Aboriginal Birth Cohort study: socio-economic status at birth and  
48 cardiovascular risk factors to 25 years of age," *Med. J. Aust.*, vol. 211, no. 6, pp. 265–270, Sep. 2019,  
49 doi: 10.5694/mja2.50285.
- 50 [34] B. Davison, J. Goodall, S. Whalan, K. Montgomery-Quin, T. Howarth, and G. Singh, "Nutritional dual  
51 burden in Indigenous young adults: The geographical differential," *Aust. J. Rural Health*, vol. 27, no. 1,  
52 pp. 14–21, Feb. 2019, doi: 10.1111/ajr.12439.
- 53  
54  
55  
56  
57  
58  
59  
60

- 1  
2  
3 [35] R. Gaillard *et al.*, "Childhood Cardiometabolic Outcomes of Maternal Obesity During  
4 Pregnancy Novelty and Significance: The Generation R Study," *Hypertension*, vol. 63, no. 4, pp. 683–  
5 691, Apr. 2014, doi: 10.1161/HYPERTENSIONAHA.113.02671.  
6  
7 [36] G. C. Sharp *et al.*, "Maternal pre-pregnancy BMI and gestational weight gain, offspring DNA  
8 methylation and later offspring adiposity: findings from the Avon Longitudinal Study of Parents and  
9 Children," *Int. J. Epidemiol.*, vol. 44, no. 4, pp. 1288–1304, Aug. 2015, doi: 10.1093/ije/dyv042.  
10  
11 [37] T. Vaivada, M. F. Gaffey, J. K. Das, and Z. A. Bhutta, "Evidence-based interventions for improvement of  
12 maternal and child nutrition in low-income settings: what's new?," *Curr. Opin. Clin. Nutr. Metab. Care*,  
13 vol. 20, no. 3, pp. 204–210, May 2017, doi: 10.1097/MCO.0000000000000365.  
14  
15 [38] M. Ferguson, K. O'Dea, M. Chatfield, M. Moodie, J. Altman, and J. Brimblecombe, "The comparative  
16 cost of food and beverages at remote Indigenous communities, Northern Territory, Australia," *Aust.  
17 N. Z. J. Public Health*, vol. 40, no. S1, pp. S21–S26, Apr. 2016, doi: 10.1111/1753-6405.12370.  
18  
19 [39] P. Pholeros, T. Lea, S. Rainow, T. Sowerbutts, and P. J. Torzillo, "Improving the state of health  
20 hardware in Australian Indigenous housing: building more houses is not the only answer," *Int. J.  
21 Circumpolar Health*, vol. 72, no. 1, p. 21181, Jan. 2013, doi: 10.3402/ijch.v72i0.21181.  
22  
23 [40] J. Brimblecombe, M. Ferguson, F. Barzi, C. Brown, and K. Ball, "Mediators and moderators of nutrition  
24 intervention effects in remote Indigenous Australia," *Br. J. Nutr.*, vol. 119, no. 12, pp. 1424–1433, Jun.  
25 2018, doi: 10.1017/S0007114518000880.  
26  
27 [41] L. Schembri *et al.*, "The effect of nutrition education on nutrition-related health outcomes of  
28 Aboriginal and Torres Strait Islander people: a systematic review," *Aust. N. Z. J. Public Health*, vol. 40,  
29 no. S1, pp. S42–S47, Apr. 2016, doi: 10.1111/1753-6405.12392.  
30  
31 [42] J. Brimblecombe *et al.*, "Feasibility of a novel participatory multi-sector continuous improvement  
32 approach to enhance food security in remote Indigenous Australian communities," *SSM - Popul.  
33 Health*, vol. 3, pp. 566–576, Dec. 2017, doi: 10.1016/j.ssmph.2017.06.002.  
34  
35  
36  
37  
38  
39  
40  
41  
42  
43  
44  
45  
46  
47  
48  
49  
50  
51  
52  
53  
54  
55  
56  
57  
58  
59  
60

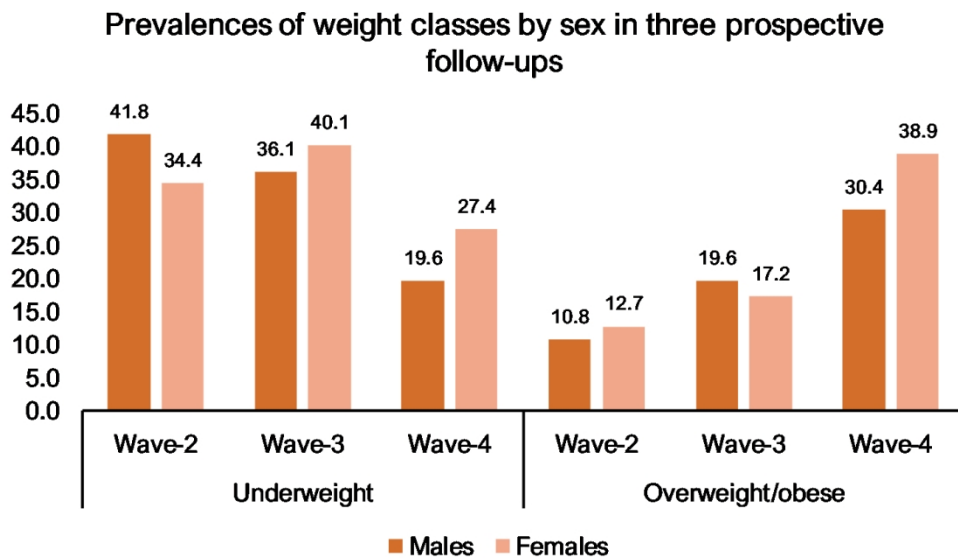

26 Figure 1. Percentages of underweight and overweight/obese participants by sex. For classification, age and  
27 sex specific cut-off points were used for participants under 18 years of age at follow-up. For participants  
28 aged 18 and over, underweight was classified as BMI < 18,5; normal weight as 18,5-24,99; overweight as  
29 25-29,99 and obesity as  $\geq 30$ .

30 127x76mm (300 x 300 DPI)

1  
2  
3  
4  
5  
6  
7  
8  
9  
10  
11  
12  
13  
14  
15  
16  
17  
18  
19  
20  
21  
22  
23  
24  
25  
26  
27  
28  
29  
30  
31  
32  
33  
34  
35  
36  
37  
38  
39  
40  
41  
42  
43  
44  
45  
46  
47  
48  
49  
50  
51  
52  
53  
54  
55  
56  
57  
58  
59  
60

Prevalences of low and high WHtR by sex in three prospective follow-ups

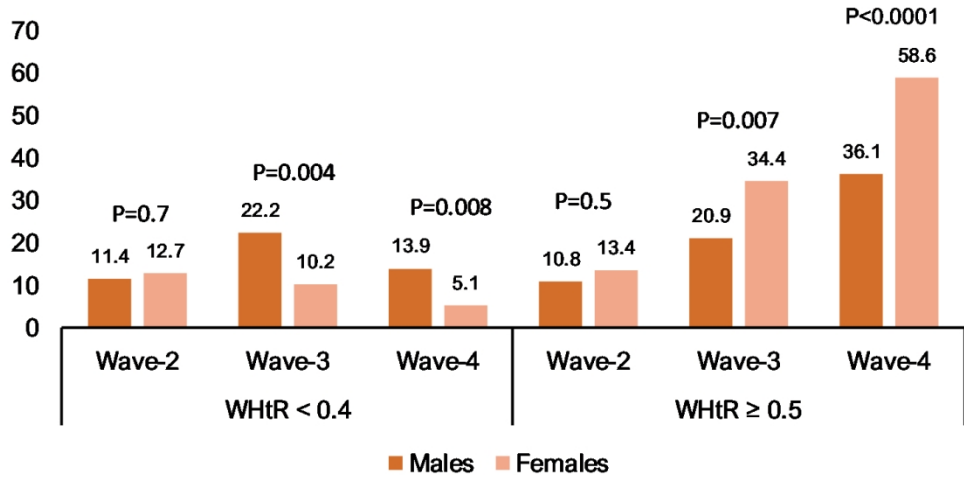

Figure 2. Prevalences for low and high waist-to-height ratio at three time points according to sex. P-values were calculated with chi-square tests and represent differences between sexes. Values are in percentages.

127x76mm (300 x 300 DPI)



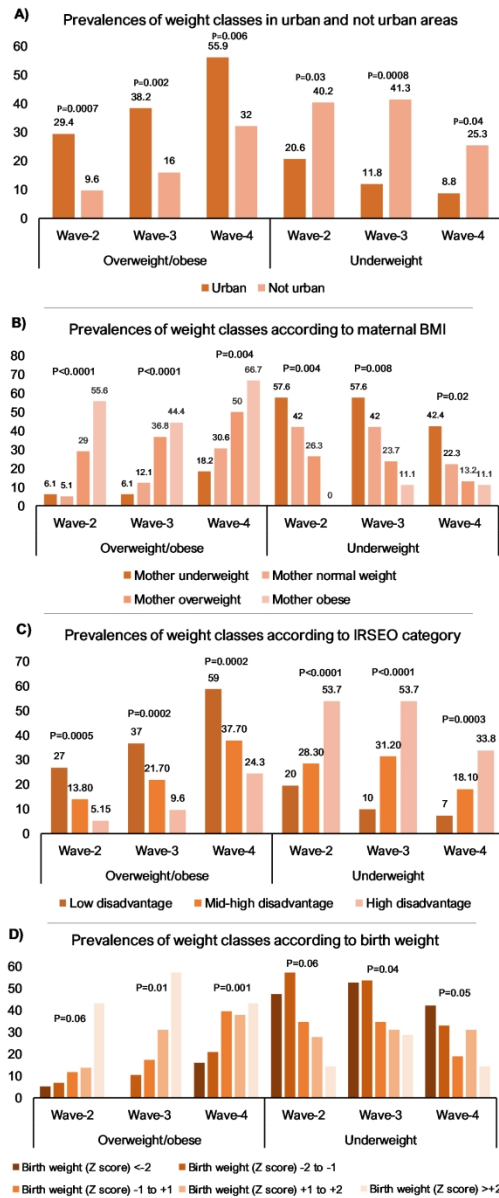

Figure 3. Prevalences of overweight/obesity and underweight in participants according to urban residence (A), maternal BMI (B), areal disadvantage (C), and birth weight (D). Chi-square tests were used to assess association between weight status and presented categories.

547x1237mm (72 x 72 DPI)

|                      | Participants<br>(N=315) | Dropouts<br>(N=371) | P-value  |
|----------------------|-------------------------|---------------------|----------|
| Males (%)            | 50.2                    | 53.1                | P=0.44   |
| Urban residence (%)  | 10.8                    | 31.8                | P<0.0001 |
| Birthweight, z score | -0.29                   | -0.30               | P=0.95   |
| IRSEO score          | 80.8                    | 65.9                | P<0.0001 |
| Maternal BMI         | 22.2                    | 22.3                | P=0.71   |

Comparison between participants and dropouts. Values for categorical variables (sex, urban residence) are presented in percentages and values for continuous variables in means. Chi-square tests were used for analysis of categorical variables and t-tests for continuous variables.

STROBE Statement—Checklist of items that should be included in reports of *cohort studies*

|                              | Item No | Recommendation                                                                                                                                                                                                                                                                                                         | Page No |
|------------------------------|---------|------------------------------------------------------------------------------------------------------------------------------------------------------------------------------------------------------------------------------------------------------------------------------------------------------------------------|---------|
| <b>Title and abstract</b>    | 1       | (a) Indicate the study's design with a commonly used term in the title or the abstract<br>(b) Provide in the abstract an informative and balanced summary of what was done and what was found                                                                                                                          | 2<br>2  |
| <b>Introduction</b>          |         |                                                                                                                                                                                                                                                                                                                        |         |
| Background/rationale         | 2       | Explain the scientific background and rationale for the investigation being reported                                                                                                                                                                                                                                   | 4-5     |
| Objectives                   | 3       | State specific objectives, including any prespecified hypotheses                                                                                                                                                                                                                                                       | 5       |
| <b>Methods</b>               |         |                                                                                                                                                                                                                                                                                                                        |         |
| Study design                 | 4       | Present key elements of study design early in the paper                                                                                                                                                                                                                                                                | 5       |
| Setting                      | 5       | Describe the setting, locations, and relevant dates, including periods of recruitment, exposure, follow-up, and data collection                                                                                                                                                                                        | 5       |
| Participants                 | 6       | (a) Give the eligibility criteria, and the sources and methods of selection of participants. Describe methods of follow-up<br>(b) For matched studies, give matching criteria and number of exposed and unexposed                                                                                                      | 5       |
| Variables                    | 7       | Clearly define all outcomes, exposures, predictors, potential confounders, and effect modifiers. Give diagnostic criteria, if applicable                                                                                                                                                                               | 6-7     |
| Data sources/<br>measurement | 8*      | For each variable of interest, give sources of data and details of methods of assessment (measurement). Describe comparability of assessment methods if there is more than one group                                                                                                                                   | 6-7     |
| Bias                         | 9       | Describe any efforts to address potential sources of bias                                                                                                                                                                                                                                                              | 5, 12   |
| Study size                   | 10      | Explain how the study size was arrived at                                                                                                                                                                                                                                                                              | 5       |
| Quantitative variables       | 11      | Explain how quantitative variables were handled in the analyses. If applicable, describe which groupings were chosen and why                                                                                                                                                                                           | 6-7     |
| Statistical methods          | 12      | (a) Describe all statistical methods, including those used to control for confounding<br>(b) Describe any methods used to examine subgroups and interactions<br>(c) Explain how missing data were addressed<br>(d) If applicable, explain how loss to follow-up was addressed<br>(e) Describe any sensitivity analyses | 8       |
| <b>Results</b>               |         |                                                                                                                                                                                                                                                                                                                        |         |
| Participants                 | 13*     | (a) Report numbers of individuals at each stage of study—eg numbers potentially eligible, examined for eligibility, confirmed eligible, included in the study, completing follow-up, and analysed<br>(b) Give reasons for non-participation at each stage<br>(c) Consider use of a flow diagram                        | 5       |
| Descriptive data             | 14*     | (a) Give characteristics of study participants (eg demographic, clinical, social) and information on exposures and potential confounders<br>(b) Indicate number of participants with missing data for each variable of interest<br>(c) Summarise follow-up time (eg, average and total amount)                         | table 1 |
| Outcome data                 | 15*     | Report numbers of outcome events or summary measures over time                                                                                                                                                                                                                                                         | table 1 |

|    |                          |    |                                                                                                                                                                                                              |       |
|----|--------------------------|----|--------------------------------------------------------------------------------------------------------------------------------------------------------------------------------------------------------------|-------|
| 1  | Main results             | 16 | (a) Give unadjusted estimates and, if applicable, confounder-adjusted estimates and their precision (eg, 95% confidence interval). Make clear which confounders were adjusted for and why they were included | 8-10  |
| 2  |                          |    |                                                                                                                                                                                                              |       |
| 3  |                          |    | (b) Report category boundaries when continuous variables were categorized                                                                                                                                    |       |
| 4  |                          |    | (c) If relevant, consider translating estimates of relative risk into absolute risk for a meaningful time period                                                                                             |       |
| 5  | Other analyses           | 17 | Report other analyses done—eg analyses of subgroups and interactions, and sensitivity analyses                                                                                                               |       |
| 6  |                          |    |                                                                                                                                                                                                              |       |
| 7  |                          |    |                                                                                                                                                                                                              |       |
| 8  |                          |    |                                                                                                                                                                                                              |       |
| 9  |                          |    |                                                                                                                                                                                                              |       |
| 10 |                          |    |                                                                                                                                                                                                              |       |
| 11 | <b>Discussion</b>        |    |                                                                                                                                                                                                              |       |
| 12 | Key results              | 18 | Summarise key results with reference to study objectives                                                                                                                                                     | 10-11 |
| 13 | Limitations              | 19 | Discuss limitations of the study, taking into account sources of potential bias or imprecision. Discuss both direction and magnitude of any potential bias                                                   | 12    |
| 14 | Interpretation           | 20 | Give a cautious overall interpretation of results considering objectives, limitations, multiplicity of analyses, results from similar studies, and other relevant evidence                                   | 11-12 |
| 15 | Generalisability         | 21 | Discuss the generalisability (external validity) of the study results                                                                                                                                        | 12    |
| 16 |                          |    |                                                                                                                                                                                                              |       |
| 17 | <b>Other information</b> |    |                                                                                                                                                                                                              |       |
| 18 | Funding                  | 22 | Give the source of funding and the role of the funders for the present study and, if applicable, for the original study on which the present article is based                                                | 1     |
| 19 |                          |    |                                                                                                                                                                                                              |       |
| 20 |                          |    |                                                                                                                                                                                                              |       |
| 21 |                          |    |                                                                                                                                                                                                              |       |
| 22 |                          |    |                                                                                                                                                                                                              |       |
| 23 |                          |    |                                                                                                                                                                                                              |       |
| 24 |                          |    |                                                                                                                                                                                                              |       |
| 25 |                          |    |                                                                                                                                                                                                              |       |
| 26 |                          |    |                                                                                                                                                                                                              |       |
| 27 |                          |    |                                                                                                                                                                                                              |       |
| 28 |                          |    |                                                                                                                                                                                                              |       |
| 29 |                          |    |                                                                                                                                                                                                              |       |
| 30 |                          |    |                                                                                                                                                                                                              |       |
| 31 |                          |    |                                                                                                                                                                                                              |       |
| 32 |                          |    |                                                                                                                                                                                                              |       |
| 33 |                          |    |                                                                                                                                                                                                              |       |
| 34 |                          |    |                                                                                                                                                                                                              |       |
| 35 |                          |    |                                                                                                                                                                                                              |       |
| 36 |                          |    |                                                                                                                                                                                                              |       |
| 37 |                          |    |                                                                                                                                                                                                              |       |
| 38 |                          |    |                                                                                                                                                                                                              |       |
| 39 |                          |    |                                                                                                                                                                                                              |       |
| 40 |                          |    |                                                                                                                                                                                                              |       |
| 41 |                          |    |                                                                                                                                                                                                              |       |
| 42 |                          |    |                                                                                                                                                                                                              |       |
| 43 |                          |    |                                                                                                                                                                                                              |       |
| 44 |                          |    |                                                                                                                                                                                                              |       |
| 45 |                          |    |                                                                                                                                                                                                              |       |
| 46 |                          |    |                                                                                                                                                                                                              |       |
| 47 |                          |    |                                                                                                                                                                                                              |       |
| 48 |                          |    |                                                                                                                                                                                                              |       |
| 49 |                          |    |                                                                                                                                                                                                              |       |
| 50 |                          |    |                                                                                                                                                                                                              |       |
| 51 |                          |    |                                                                                                                                                                                                              |       |
| 52 |                          |    |                                                                                                                                                                                                              |       |
| 53 |                          |    |                                                                                                                                                                                                              |       |
| 54 |                          |    |                                                                                                                                                                                                              |       |
| 55 |                          |    |                                                                                                                                                                                                              |       |
| 56 |                          |    |                                                                                                                                                                                                              |       |
| 57 |                          |    |                                                                                                                                                                                                              |       |
| 58 |                          |    |                                                                                                                                                                                                              |       |
| 59 |                          |    |                                                                                                                                                                                                              |       |
| 60 |                          |    |                                                                                                                                                                                                              |       |

\*Give information separately for exposed and unexposed groups.

**Note:** An Explanation and Elaboration article discusses each checklist item and gives methodological background and published examples of transparent reporting. The STROBE checklist is best used in conjunction with this article (freely available on the Web sites of PLoS Medicine at <http://www.plosmedicine.org/>, Annals of Internal Medicine at <http://www.annals.org/>, and Epidemiology at <http://www.epidem.com/>). Information on the STROBE Initiative is available at <http://www.strobe-statement.org>.
