# Supplementary material for: Socioeconomic status, remoteness and tracking of nutritional status from childhood to adulthood in an Australian Aboriginal Birth Cohort: the ABC study
Source: PubMed Central journal article supplement — BMJ Open. 2020 Jan 27;10(1):e033631. doi: 10.1136/bmjopen-2019-033631 (PMC7045147; doi:10.1136/bmjopen-2019-033631), 2020-01-27
Supplement: bmjopen-2019-033631supp001.pdf [file bmjopen-2019-033631supp001.pdf]

|                      | Participants<br>(N=315) | Dropouts<br>(N=371) | P-value  |
|----------------------|-------------------------|---------------------|----------|
| Males (%)            | 50.2                    | 53.1                | P=0.44   |
| Urban residence (%)  | 10.8                    | 31.8                | P<0.0001 |
| Birthweight, z score | -0.29                   | -0.30               | P=0.95   |
| IRSEO score          | 80.8                    | 65.9                | P<0.0001 |
| Maternal BMI         | 22.2                    | 22.3                | P=0.71   |

Comparison between participants and dropouts. Values for categorical variables (sex, urban residence) are presented in percentages and values for continuous variables in means. Chi-square tests were used for analysis of categorical variables and t-tests for continuous variables.
